## **Neural crest cells regulate optic cup morphogenesis by promoting extracellular matrix assembly**

Chase D. Bryan<sup>1</sup>, Rebecca L. Pfeiffer<sup>2</sup>, Bryan W. Jones<sup>2</sup>, Kristen M. Kwan<sup>1,\*</sup>

### **Affiliations**

<sup>1</sup> Department of Human Genetics, University of Utah, Salt Lake City, UT, USA

<sup>2</sup> Department of Ophthalmology and Visual Sciences, John A. Moran Eye Center, University of Utah School of Medicine, Salt Lake City, UT, USA

\* Correspondence to: Department of Human Genetics, EIHG 5100, University of Utah Medical Center, 15 North 2030 East, Salt Lake City, UT 84112, USA.

Email address: [kmkwan@genetics.utah.edu](mailto:kmkwan@genetics.utah.edu)

## 1 **Abstract**

2 The interactions between an organ and its surrounding environment are critical in regulating its  
3 development. In vertebrates, neural crest and mesodermal mesenchymal cells have been  
4 observed close to the eye during development, and mutations affecting this periocular  
5 mesenchyme can cause defects in early eye development, yet the underlying mechanism has  
6 been unknown. Here, using timelapse microscopy and four-dimensional cell tracking in  
7 zebrafish, we establish that genetic loss of neural crest impairs cell movements within the optic  
8 vesicle. At the ultrastructural level, neural crest cells are required for basement membrane  
9 formation specifically around the retinal pigment epithelium. Neural crest cells express the  
10 extracellular matrix crosslinking protein nidogen and, strikingly, ectopically expressing nidogen  
11 in the absence of neural crest partially restores optic cup morphogenesis. These results  
12 demonstrate that the neural crest is required for local establishment of ocular extracellular matrix  
13 superstructure, which in turn drives optic cup morphogenesis.

14

## 15 **Introduction**

16 Vertebrate eye development begins with specification of the eye field, followed by a  
17 series of tissue movements that together comprise optic cup morphogenesis (Hilfer, 1983;  
18 Schmitt and Dowling, 1994; Schook, 1980; Walls, 1942). Initially, a pair of optic vesicles  
19 evaginate bilaterally from the developing forebrain; the bilayered optic vesicles give rise to the  
20 neural retina and retinal pigment epithelium (RPE). As these vesicles elongate, the connection  
21 between the vesicle and brain is constricted, generating the optic stalk. Multiple cell and tissue  
22 movements occur during invagination, the final stage of optic cup morphogenesis: the optic  
23 vesicles buckle and take on a hemispherical shape to enwrap the lens as it invaginates from the

24 overlying ectoderm. Additionally, the optic fissure forms along the ventral side of the optic  
25 vesicle and optic stalk. Lineage tracing and live imaging experiments performed in zebrafish  
26 have enabled cellular-level analysis of the morphogenetic movements that occur during these  
27 stages of eye development. These experiments have revealed that during invagination, a subset  
28 of cells that arise on the medial layer of the optic vesicle migrate around the rim of the vesicle  
29 and eventually take up residence within the lateral layer, contributing to the neural retina; those  
30 which remain on the medial layer flatten and comprise the RPE (Heermann et al., 2015; Kwan et  
31 al., 2012; Li et al., 2000; Picker et al., 2009; Sidhaye and Norden, 2017). Despite  
32 characterization of these cellular movements, the cellular and molecular mechanisms underlying  
33 many aspects of these processes are not well understood.

34         In addition to these complex tissue movements and rearrangements, the optic vesicle  
35 undergoes morphogenesis in a complex environment containing multiple extraocular tissues,  
36 including the overlying ectoderm from which the lens will develop, the prospective brain, and  
37 the periocular mesenchyme (POM). Mesenchymal cells influence the development and  
38 morphogenesis of many epithelial organs, such as tooth and salivary gland, by producing growth  
39 factors and signaling molecules such as BMPs, WNTs, and FGFs (Thesleff, 2003; Wells et al.,  
40 2013), or through modifications to the extracellular matrix (ECM) that surrounds developing  
41 epithelia. For example, mesenchymal cells can influence morphogenesis through cleavage and  
42 destruction of ECM via proteolysis: in the developing mouse lung, mesenchymally-expressed  
43 matrix metalloproteinase-2 (MMP-2) is required for branching morphogenesis (Kheradmand et  
44 al., 2002). Conversely, mesenchymal cells can also promote epithelial morphogenesis through  
45 deposition of new ECM components such as laminin and nidogen, reviewed in (Nelson and  
46 Larsen, 2015).

47 Previous work has indicated a role for epithelial-mesenchymal interactions during optic  
48 cup morphogenesis, although the exact role and molecular nature of these interactions are poorly  
49 understood. The POM is a heterogeneous cell population in close proximity to the optic cup,  
50 comprised of neural crest cells and mesodermally-derived mesenchyme (Johnston et al., 1979),  
51 and multiple tissues in the mature eye are derived in part from these mesenchymal cell  
52 populations (Williams and Bohnsack, 2015). Recent work also indicates a role for POM in  
53 closure of the optic fissure, a developmental step subsequent to optic cup formation (Gestri et al.,  
54 2018). Yet in addition to these later roles, disruptions to transcription factors expressed in the  
55 POM during early eye development, such as *ap2a*, *pitx2* or *zic2*, lead to severe optic cup  
56 malformations (Bassett et al., 2010; Bohnsack et al., 2012; Gestri et al., 2009; Li and Cornell,  
57 2007; Sedykh et al., 2017). These data suggest a critical role for the POM in regulating optic cup  
58 morphogenesis, possibly through regulating direct or indirect signaling to the optic cup.  
59 Communication between these tissues appears to be bidirectional: the developing optic vesicle is  
60 known to signal to the migratory neural crest, in part through retinoic acid and PDGF signaling  
61 (Bohnsack et al., 2012; Eberhart et al., 2008; Lupo et al., 2011). In zebrafish *rx3* mutants, eye  
62 specification fails to occur; these embryos subsequently display aberrant craniofacial neural crest  
63 migration (Langenberg et al., 2008), indicating that the eye is at least partially responsible for  
64 facilitating proper neural crest migration. However, many of the molecules that mediate these  
65 bidirectional epithelial-mesenchymal interactions during optic cup morphogenesis have yet to be  
66 discovered.

67 Although there are hints that secreted morphogens such as Hedgehog or TGF- $\beta$  may be  
68 crucial for crosstalk between the optic vesicle and the POM (Fuhrmann et al., 2000; Grocott et  
69 al., 2011; Sedykh et al., 2017), mesenchymal cells may also regulate optic cup development by



70 modifying the ECM. A complex ECM has long been known to surround the developing optic  
71 vesicle throughout optic cup morphogenesis (Dong and Chung, 1991; Hendrix and Zwaan, 1975;  
72 Kwan, 2014; Peterson et al., 1995; Svoboda and O'Shea, 1987; Tuckett and Morriss-Kay, 1986),  
73 yet the dynamics of ECM deposition and remodeling around the developing eye are poorly  
74 understood. Only recently have specific roles of fibronectin (Hayes et al., 2012; Huang et al.,  
75 2011) and laminin (Bryan et al., 2016; Ivanovitch et al., 2013; Sidhaye and Norden, 2017) during  
76 optic cup morphogenesis been elucidated, and both of these ECM proteins are expressed by the  
77 optic vesicle itself. POM cells could modify the ocular ECM by expressing ECM-degrading  
78 proteins such as metalloproteases, or by providing structural ECM proteins such as nidogens:  
79 both are expressed by mesenchymal cells during morphogenesis of other organs. The roles of  
80 many ECM proteins during optic cup morphogenesis, especially those which may be produced  
81 by mesenchymal cells, have not been studied in detail, and their functions during this particular  
82 process remain a mystery.

83         The POM likely regulates multiple aspects of optic cup morphogenesis, yet many  
84 questions remain about the nature of the interactions between the POM and the developing eye.  
85 In this study, we sought to determine the role of the neural crest in regulating morphogenesis of  
86 the developing optic cup. When and where do neural crest cells interact with the optic vesicle  
87 during optic cup morphogenesis? Is the neural crest cell population actually required for optic  
88 cup morphogenesis? Are there morphogenetic events within the developing eye that depend on  
89 the neural crest? At a molecular level, how do neural crest cells interact with and regulate  
90 behaviors within the optic cup? Here we demonstrate that loss of neural crest cells, via two  
91 independent genetic methods, impairs optic cup morphogenesis. Using 4-dimensional timelapse  
92 imaging and computational methods, we pinpoint specific cell movements within the optic cup

93 that are dependent on the neural crest. We further demonstrate that loss of neural crest leads to a  
94 dramatic disruption of basement membrane formation, but only around the RPE. Finally, we  
95 uncover a key molecular effector of neural crest crosstalk with the eye: our results indicate that  
96 neural crest cells regulate optic cup morphogenesis through deposition of nidogens, crucial  
97 modulators of ECM structure.

## 98 **Results**

### 99 Neural crest is in contact with the optic vesicle throughout optic cup morphogenesis

100 In zebrafish, optic cup morphogenesis occurs from 10-24 hours post fertilization (hpf),  
101 during which time the optic vesicles evaginate and undergo a series of stereotypical movements  
102 and shape changes to become the organized optic cup, comprised of the neural retina, retinal  
103 pigment epithelium (RPE), and lens. To begin to determine the nature of how the neural crest  
104 cell population might affect optic cup morphogenesis, we first sought to identify when and where  
105 neural crest cells interact with developing eye tissues. To visualize both the developing eye and  
106 neural crest, we crossed two transgenic zebrafish lines: *Tg(bactin2:EGFP-CAAX)<sup>z200</sup>*, in which  
107 GFP ubiquitously labels cell membranes, and *Tg(sox10:memRFP)<sup>vu234</sup>* (Kirby et al., 2006), in  
108 which neural crest cell membranes are marked with membrane-bound RFP. Using embryos from  
109 this cross, we performed 4-dimensional timelapse imaging during optic cup morphogenesis, from  
110 12.5 hpf-24.5 hpf (Fig 1, Movies S1, S2). At the start of our imaging at 12.5 hpf, neural crest  
111 cells are coming into contact with the posterior margin of the optic vesicle (Fig 1A, A'). Initially,  
112 neural crest cells migrate anteriorly in the space between the prospective brain and optic vesicle  
113 (Fig 1B, Movie S1); beginning around 16 hpf, the developing optic stalk is gradually enwrapped  
114 by neural crest cells (Fig 1B', Movie S2). Neural crest cells also migrate laterally and ventrally  
115 to encompass the posterior and ventral sides of the optic cup, appearing to be in close contact  
116 with the developing eye. By 24.5 hpf, the neural crest has entered the optic fissure and migrates  
117 toward the space between the neural retina and lens (Fig 1D', *arrow*). By the end of optic cup  
118 morphogenesis, neural crest-derived cells have encapsulated the RPE side of the optic cup (Fig  
119 1D).

120

121 Neural crest cells are required for proper optic cup morphogenesis

122 Multiple studies have suggested that there is developmental crosstalk between the  
123 developing eye and the neural crest (Bohnsack et al., 2012; Eberhart et al., 2008; Grocott et al.,  
124 2011; Langenberg et al., 2008; Sedykh et al., 2017). Since we observed neural crest cells in  
125 contact with the optic vesicles at early stages of eye development, we sought to determine  
126 whether neural crest cells are required for proper optic cup morphogenesis. To test the  
127 requirement for neural crest, we used two independent genetic models, both of which exhibit a  
128 widespread depletion of neural crest.

129 The zebrafish *tfap2a;foxd3* double mutant has been demonstrated to exhibit a strong loss  
130 of neural crest cells (Arduini et al., 2009; Wang et al., 2011). We crossed adult  
131 *tfap2a<sup>ts213</sup>;foxd3<sup>zdf10</sup>* heterozygote carriers to two transgenic lines: *Tg(bactin2:EGFP-CAAX)* and  
132 *Tg(sox10:memRFP)*. Crossing these two transgenic/double heterozygote lines enabled us to  
133 visualize the optic cup as well as to assay the presence of any remaining neural crest cells in the  
134 *tfap2a;foxd3* double mutant. At 24 hpf, *tfap2a;foxd3* double mutants display mild but  
135 reproducible optic cup morphogenesis defects. At the dorsal-ventral midpoint of the optic cup,  
136 the nasal side of the neural retina is flatter than in sibling control embryos and fails to completely  
137 enwrap the lens, indicative of a defect in optic cup invagination (Fig 2A, B). Quantification of  
138 optic cup invagination angle indicates a significant decrease in the extent to which the retina  
139 enwraps the lens in *tfap2a;foxd3* double mutants ( $37.8 \pm 1.9^\circ$ ) compared to wildtype controls  
140 ( $47.3 \pm 1.8^\circ$ ; Fig 2G). The optic fissure, a cleft-like structure along the ventral side of the optic  
141 stalk and optic cup, is also aberrant in *tfap2a;foxd3* double mutants. At 24 hpf, control embryos  
142 display two closely apposed fissure margins (Fig 2H) while the margins in *tfap2a;foxd3* double  
143 mutants are wider set, indicating that optic fissure development is abnormal (Fig 2I). Visualizing

144 *sox10:memRFP*-positive cells indicates that, as expected, neural crest cells are substantially  
145 reduced in the vicinity of the optic cup in *tfap2a;foxd3* double mutants (Fig 2E, L) compared to  
146 wildtype controls (Fig 2D, K), with a notable absence on the nasal side of the optic cup (Fig 2L).  
147 Since incrosses of *tfap2a;foxd3* heterozygote adults yield both single as well as double mutant  
148 genotypes, we characterized *tfap2a* and *foxd3* single mutants as well. Neither single mutant  
149 displays as apparent optic cup morphogenesis defects or decrease in invagination angle as the  
150 double mutant (Fig S1A, B, E), likely due to the presence of more neural crest cells in either  
151 single mutant compared to the double mutant (Fig S1C, D).

152         As a second means of testing the requirement for neural crest cells in optic cup  
153 morphogenesis, we assayed optic cup morphogenesis in *alyron<sup>z24</sup> (paf1)* mutants in which neural  
154 crest development is severely impaired (Cretkos and Grunwald, 1999). Although ubiquitously  
155 expressed, disruptions to components of the RNA Polymerase II-Associated Factor (Paf1)  
156 complex result in severe reductions in neural crest gene expression, coupled with developmental  
157 defects in neural crest derived tissues (Akanuma et al., 2007; Langenbacher et al., 2011; Nguyen  
158 et al., 2010). We observe that optic cup invagination is more severely disrupted in *paf1* mutants  
159 ( $25.6\pm 3.6^\circ$ ) when compared to wildtype controls or *tfap2a;foxd3* double mutants (Fig 2C, G).  
160 We also visualized neural crest in *paf1* mutants and saw a substantial reduction in  
161 *sox10:memRFP*-positive cells surrounding the optic cup at 24 hpf (Fig 2F, M), similar to the  
162 neural crest loss seen in the *tfap2a;foxd3* double mutant. However, as *paf1* and other members of  
163 the Paf1 complex are expressed ubiquitously (Nguyen et al., 2010; Thisse and Thisse, 2004), it is  
164 possible that *paf1* also plays an intrinsic role in development of the optic vesicle itself, which  
165 could account for the more severe morphogenesis defects we observe in the *paf1* mutants. Thus,

166 further analysis on the role of neural crest in optic cup morphogenesis was carried out solely  
167 using the *tfap2a;foxd3* double mutant.

168 Previous studies have suggested a role for the periocular mesenchyme in closure of the  
169 optic fissure along the ventral side of the retina and optic stalk (Gestri et al., 2018; Hero, 1990;  
170 Hero et al., 1991; James et al., 2016; Lupo et al., 2011; Weiss et al., 2012). Consistent with these  
171 data, we see optic fissure defects and gaps in ocular pigmentation (indicative of coloboma) in  
172 59.38% of *tfap2a;foxd3* double mutants at 52 hpf versus 7.62% of control embryos (n=19/32 and  
173 n=8/105, respectively; data from three separate clutches; Fig 2N, O). However, these previous  
174 studies have focused largely on later stages of optic fissure fusion, during which the POM appear  
175 to play an active role. Therefore, our observations at 24 hpf demonstrate that the neural crest  
176 additionally plays a role in the early stages of optic cup morphogenesis.

177

178 TGF- $\beta$  signaling is unaffected by loss of neural crest, while Pax2a expression is expanded

179 The finding that neural crest cells are required for early stages of optic cup  
180 morphogenesis raised the possibility that neural crest cells were providing a signaling cue to the  
181 developing optic cup; an intriguing candidate we first tested was TGF- $\beta$  signaling. Work  
182 performed in chick optic vesicle explants demonstrated that POM cells are necessary for proper  
183 RPE specification and development, a requirement that could be bypassed with treatment with  
184 the TGF- $\beta$  family member Activin (Fuhrmann et al., 2000). Other experiments have suggested  
185 that neural crest cells repress lens specification through TGF- $\beta$  signaling to ensure proper  
186 positioning of the lens (Grocott et al., 2011). Thus, we sought to determine whether the neural  
187 crest is necessary for TGF- $\beta$  signaling to the developing eye in zebrafish. Using an antibody  
188 against phospho-Smad3 to detect sites of active TGF- $\beta$  signaling, we did not detect any

189 differences in phospho-Smad3 localization between control and mutant optic cups at 24 hpf (Fig  
190 3A, C vs 3B, D; Fig S2A-D). This result indicates that the neural crest subpopulation of POM is  
191 not required for proper TGF- $\beta$  signaling at the end of zebrafish optic cup morphogenesis.

192 As we observed morphogenetic abnormalities in nasal and ventral portions of the optic  
193 cup in *tfap2a;foxd3* double mutants, we hypothesized that the neural crest might be required for  
194 some aspect of optic cup patterning. Using an antibody against Pax2a, a transcription factor  
195 expressed in the ventral optic cup and optic stalk (Fig 3E, G), we found that Pax2a expression is  
196 expanded into the RPE layer in *tfap2a;foxd3* double mutants, in cells located more dorsally or  
197 temporally than observed in wildtype eyes (arrowheads in Fig 3F, H). We quantified the portion  
198 of the optic cup which expressed Pax2a as an angle (schematized in Fig 3J) and find that  
199 expression is significantly expanded in the *tfap2a;foxd3* double mutant ( $134.2\pm 10.5^\circ$ ) compared  
200 to control embryos ( $100.3\pm 5.9^\circ$ ; Fig 3I). This expansion was consistently observed in  
201 *tfap2a;foxd3* double mutants as well as both *tfap2a* and *foxd3* single mutants (Fig S2E-H). In  
202 other models of ventral optic cup mispatterning, especially due to aberrant or increased  
203 Hedgehog signaling, Pax2a is expanded not just into the RPE layer but throughout the ventral  
204 hemisphere of the retina (Lee et al., 2008; Sedykh et al., 2017). This phenotype we observe here  
205 is distinct in its restriction to the RPE layer, and suggests that perhaps gross mispatterning of the  
206 ventral optic cup does not occur when neural crest is lost, but rather, some aspect of cell  
207 movements within the optic cup is disrupted.

208

#### 209 Neural crest cells are required for proper cell movements within the optic vesicle

210 We observed optic cup invagination defects and ectopic Pax2a expression in cells in the  
211 RPE layer at 24 hpf, which suggested that cell movements within the optic cup might be

212 disrupted in the *tfap2a;foxd3* double mutant. We therefore sought to pinpoint when and where  
213 cell movements are disrupted in the *tfap2a;foxd3* double mutant. Determining how widespread  
214 movement defects are would provide clues regarding the nature and role of the interactions  
215 between the optic vesicle and neural crest. We directed our attention to two movements executed  
216 by cells which reside in the medial layer of the optic vesicle, as these are the cells potentially  
217 interacting with the neural crest, as visualized in Figure 1. The first movement is that of  
218 prospective RPE cells, while the second, rim involution, involves a subset of cells that migrate  
219 around the developing optic cup rim from the medial layer into the lateral layer, the prospective  
220 neural retina (Heermann et al., 2015; Kwan et al., 2012; Picker et al., 2009; Sidhaye and Norden,  
221 2017). In mutant optic cups, expanded Pax2a expression in the RPE layer could result from  
222 failure of Pax2a-expressing cells to undergo rim movement into the neural retina, thus remaining  
223 in the apparent RPE layer of the optic cup; we hypothesized that rim involution might be  
224 disrupted in the absence of neural crest cells. To test this possibility, as well as to determine how  
225 widespread the cell movements are which depend on the neural crest, we performed live imaging  
226 and 4-dimensional cell tracking of optic cup morphogenesis in wildtype and *tfap2a;foxd3* double  
227 mutant embryos (Fig 4, Movie S3).

228         As we saw distinct invagination defects in the nasal hemisphere of 24 hpf *tfap2a;foxd3*  
229 double mutant optic cups, we began by selecting nasal RPE and retina cells in their final  
230 positions at 24 hpf. We then tracked these cells retrospectively to establish their origins and  
231 movements from optic vesicle stage; a subset of tracked cells and trajectories is shown in Figure  
232 4. First we visualized RPE cell movements and found clear changes in the trajectory of  
233 *tfap2a;foxd3* double mutant cells. While the nasal RPE population arises in the same starting  
234 position in both wildtype and double mutant embryos, wildtype nasal RPE cells execute a



235 gradual, arc-like trajectory toward the nasal-lateral portion of the RPE and continually move  
236 toward the anterior and lateral sides of the embryo (Fig 4C-C''', Movie S4). In contrast, the  
237 *tfap2a;foxd3* nasal RPE cells move in a straight, anterior direction until 19.5 hpf, when they  
238 make a sudden, 90-degree turn in the lateral direction (Fig 4D-D''', Movie S5). To our surprise,  
239 when we quantify these cell movements (Fig 4I-K), we find that nasal RPE cells move faster and  
240 farther in *tfap2a;foxd3* double mutants (average speed =  $0.57\pm 0.02$   $\mu\text{m}/\text{min}$ ; total distance =  
241  $385.75\pm 15.71$   $\mu\text{m}$ ) than wildtypes (average speed =  $0.45\pm 0.05$   $\mu\text{m}/\text{min}$ ; total distance =  
242  $303.01\pm 34.06$   $\mu\text{m}$ ; Fig 4I, J). Additionally, net displacement of nasal RPE cells is increased in  
243 *tfap2a;foxd3* double mutants ( $170.76\pm 14.55$   $\mu\text{m}$ ) compared to wildtypes ( $131.17\pm 10.16$   $\mu\text{m}$ ),  
244 indicating that these cells do not arrive at the correct position within the optic cup. Taken  
245 together, these data confirm that neural crest is required for proper migration and positioning of  
246 nasal RPE cells during optic cup morphogenesis.

247 Through cell tracking, we also identified defects in the movements of nasal retinal cells.  
248 We find that both wildtype (Fig 4E-E''', Movie S6) and *tfap2a;foxd3* double mutant nasal retinal  
249 cells (Fig 4F-F''', Movie S7) arise in equivalent domains (Kwan et al., 2012) and follow a  
250 similar trajectory during optic cup morphogenesis, with one key difference: while wildtype  
251 retinal cells undergo a lateral turn away from the midline around 17.75 hpf (Movie S6), that  
252 same turn is delayed in the *tfap2a;foxd3* mutant until approximately 19.5 hpf (Movie S7).  
253 Similar to the nasal RPE population, nasal retinal cells move faster and farther in the  
254 *tfap2a;foxd3* double mutant (average speed =  $0.60\pm 0.04$   $\mu\text{m}/\text{min}$ ; total distance =  $402.80\pm 17.33$   
255  $\mu\text{m}$ ) than wildtype (average speed =  $0.53\pm 0.03$   $\mu\text{m}/\text{min}$ ; total distance =  $352.41\pm 29.99$   $\mu\text{m}$ ; Fig  
256 4I, J), although net displacement of these cells is unchanged (wildtype= $111.55\pm 18.18$   $\mu\text{m}$ , vs.  
257 *tfap2a;foxd3*= $124.08\pm 8.43$   $\mu\text{m}$ ).

258 Our observation of expanded Pax2a expression into the temporal RPE suggested that cell  
259 movements may be disrupted on that side of the optic cup as well. Despite a lack of gross  
260 morphological defects on the temporal side of the optic cup, we found differences between  
261 wildtype and *tfap2a;foxd3* double mutant cell trajectories on this side of the optic vesicle as well.  
262 In wildtype embryos, the cells which undergo rim involution on the temporal side begin to  
263 migrate around the rim of the optic cup at approximately 20 hpf, with noticeable movement into  
264 the neural retina visible by 22 hpf (Fig 4G-G''', Movie S8). In the *tfap2a;foxd3* double mutant,  
265 these same cells do not begin migrating around the rim until 22 hpf (Fig 4 H-H''', Movie S9). As  
266 observed with cells on the nasal side of the retina, temporal retinal cell speeds and distances  
267 traveled are significantly increased in the *tfap2a;foxd3* double mutant (average speed =  
268  $0.57 \pm 0.04$   $\mu\text{m}/\text{min}$ ; total distance =  $375.01 \pm 27.53$   $\mu\text{m}$ ) compared to wildtype (average speed =  
269  $0.52 \pm 0.01$   $\mu\text{m}/\text{min}$ ; total distance =  $341.35 \pm 12.86$   $\mu\text{m}$ ; Fig 4I, J), while net displacement remains  
270 unchanged (wildtype= $78.50 \pm 15.07$   $\mu\text{m}$ , vs. *tfap2a;foxd3*= $71.48 \pm 20.79$   $\mu\text{m}$ ).

271 These results reveal that the neural crest regulates cell movements within the optic  
272 vesicle, and underscore the power of 4-dimensional individual cell tracking. In all cell  
273 populations tracked, we identified differences in cell speed and distance travelled when  
274 comparing wildtype to *tfap2a;foxd3* double mutants; additionally, we observed trajectory timing  
275 changes in the absence of neural crest indicating delays in rim involution. Most strikingly,  
276 however, was the effect of loss of neural crest on the trajectory and positioning of the nasal RPE.  
277 While the other cell populations we tracked reach the correct position and do not show  
278 differences in net displacement, the cells which comprise the nasal RPE do not reach the correct  
279 position in *tfap2a;foxd3* double mutants, as indicated by the change in net displacement.  
280 Consistent with neural crest cells migrating in close proximity to the medial side of the optic

281 vesicle (Fig 1) where cells will either contribute to the RPE or undergo rim involution to  
282 contribute to the neural retina, these data demonstrate that the neural crest is critical for  
283 regulation of RPE cell movements and rim involution during optic cup morphogenesis.

284

285 Basement membrane formation is disrupted around the RPE in *tfap2a;foxd3* double mutants

286 Having demonstrated a role for neural crest cells in regulating cell movements within the  
287 developing optic cup, we sought to determine the underlying molecular mechanism. Although  
288 TGF- $\beta$  signaling had been a tantalizing candidate (Fuhrmann et al., 2000; Grocott et al., 2011),  
289 our phospho-Smad3 antibody staining results indicated that TGF- $\beta$  signaling to the zebrafish  
290 optic cup is not disrupted in the absence of neural crest. Having identified defects in cell  
291 movements in many regions of the optic cup, we asked how neural crest might regulate these cell  
292 behaviors. Prior work in other systems indicated that mesenchymal cells can regulate epithelial  
293 morphogenesis via alterations to the extracellular matrix. We therefore asked whether there  
294 might be defects in the ECM surrounding the optic cup when neural crest is lost. By using  
295 transmission electron microscopy to directly observe ECM, we visualized assembled basement  
296 membranes at the basal surfaces of the brain and RPE, as well as the neural retina and lens in 24  
297 hpf control and *tfap2a;foxd3* double mutant embryos (Fig 5). Although neural crest cells migrate  
298 in the space between the brain and the optic vesicle, the basement membrane lining the  
299 developing forebrain in *tfap2a;foxd3* double mutants appears indistinguishable from control  
300 embryos (Fig 5A, B); the basement membranes lining the neural retina (Fig 5E, F) and lens (Fig  
301 5G, H) also appeared normal in the *tfap2a;foxd3* double mutants compared to wildtype controls.  
302 To our surprise, we found that only the basement membrane surrounding the RPE was defective  
303 in the *tfap2a;foxd3* double mutant (Fig 5D, D'); this basement membrane appears disorganized

304 and discontinuous compared to the same structure in controls (Fig 5C, C'). These results indicate  
305 that neural crest cells are required for basement membrane formation around the optic cup,  
306 specifically the basement membrane surrounding the RPE. To our knowledge, this is the first  
307 indication of neural crest being required to build basement membrane around the developing eye.

308

309 The ECM crosslinking protein Nidogen is produced by neural crest and is lost in the  
310 *tfap2a;foxd3* double mutant

311 To determine how basement membrane formation is disrupted in the *tfap2a;foxd3* double  
312 mutant, we next set out to determine what individual extracellular matrix components might be  
313 affected. We asked whether localization or expression of the ECM components laminin-1 and  
314 fibronectin were altered in the *tfap2a;foxd3* double mutant. Antibody staining for laminin (Fig  
315 S3A-D) and fibronectin (Fig S3E-H) revealed no obvious differences between wildtype and  
316 double mutant embryos.

317 In mouse, the ECM protein nidogen has been found to be necessary for lung and kidney  
318 epithelial morphogenesis, yet is provided by surrounding mesenchymal cells (Bader et al., 2005;  
319 Ekblom et al., 1994; Kadoya et al., 1997; Willem et al., 2002). Nidogen is an extracellular matrix  
320 crosslinking protein which is critical for basement membrane assembly in other systems (Bader  
321 et al., 2005; Böse et al., 2006; Ekblom et al., 1994; Kadoya et al., 1997), and, along with  
322 laminin-1, is one of two ECM proteins required to be included in the medium to support  
323 embryonic-stem-cell-derived optic cup morphogenesis *in vitro* (Eiraku et al., 2011). We asked  
324 whether nidogen localization might be disrupted around the eye in the *tfap2a;foxd3* double  
325 mutant. Antibody staining in wildtype embryos revealed that nidogen protein is detected around  
326 cells which exhibit mesenchymal morphology and occupy the same space as neural crest cells

327 migrating between the brain and the optic vesicle at 18 hpf (Fig 6A, A'). Staining is also  
328 detectable at the basal surfaces surrounding the RPE, neural retina, and lens at 24 hpf (Fig 6C-  
329 C''), consistent with localization within the basement membrane. In contrast, *tfap2a;foxd3*  
330 double mutants that lack neural crest cells also lack nidogen protein between the brain and RPE  
331 (Fig 6B, B', D, D'), yet nidogen staining at the basal surfaces of the lens and at the lens-retina  
332 interface is unaffected (Fig 6D''). These data indicate that nidogen is broadly localized to the  
333 ECM in wildtype embryos, but is specifically lost around the RPE when neural crest is lost.

334 In mouse, nidogen expression has been observed in the POM and invaginating lens  
335 (Dong and Chung, 1991), and zebrafish *in situ* hybridizations suggest that both *nidogen 1b* and  
336 *nidogen 2a* are expressed in the cranial neural crest (Kudoh et al., 2001; Thisse and Thisse, 2004;  
337 Zhu et al., 2017). Despite these observations, the role of nidogen during optic cup morphogenesis  
338 has not been investigated *in vivo*. Because the specific periocular cell populations expressing  
339 nidogens had not been completely defined, we sought to determine with cellular resolution the  
340 expression of the four zebrafish *nidogen* genes in and around the developing eye. Using  
341 *Tg(sox10:GFP)<sup>ba4</sup>* transgenics, we found that both *nid1b* and *nid2a* are expressed in *sox10:GFP*-  
342 positive neural crest cells migrating around the developing optic cup (Fig 7). We also observed  
343 both *nid1b* and *nid2a* expressed in the overlying ectoderm and the developing lens at 18 and 24  
344 hpf, while both are notably absent from the neural retina and RPE. At these same times, *nid1a* is  
345 expressed solely in the developing somites (Fig S4A, E, I), while *nid2b* is detected diffusely  
346 throughout the head (Fig S4D, H, L).

347 Taken together, these data suggest that neural crest cells produce the nidogen proteins  
348 found in the basal surface of the developing RPE, while the ectoderm and lens placode produce  
349 nidogen found surrounding the lens and basal surface of the neural retina.

350 Dominant-interfering nidogen disrupts optic cup morphogenesis

351           The basement membrane loss we observed around the RPE in the *tfap2a;foxd3* double  
352 mutant was reminiscent of the basement membrane loss observed when nidogen has been  
353 disrupted in mouse models of organogenesis, either through loss of function mutations or  
354 through disruptions to laminin-nidogen complex formation (Bader et al., 2005; Ekblom et al.,  
355 1994; Kadoya et al., 1997; Willem et al., 2002). This observation, coupled with the finding that  
356 *nid1b* and *nid2a* are expressed by neural crest cells during optic cup morphogenesis, suggested a  
357 potential functional role for nidogen in optic cup morphogenesis. Previous studies have reported  
358 genetic compensation when some but not all nidogens were disrupted (Bader et al., 2005; Böse et  
359 al., 2006; Zhu et al., 2017); since there are two nidogens expressed by neural crest and a third  
360 expressed diffusely throughout the head, we elected to use a dominant-interference strategy to  
361 disrupt nidogen function. We took advantage of a well characterized truncated form of nidogen,  
362 Nd-III, which lacks the G1 and G2 domains required for binding to collagen IV and heparin  
363 sulfate proteoglycan, but retains the laminin binding domain (Fox et al., 1991; Reinhardt et al.,  
364 1993). As shown through characterization *in vitro*, Nd-III acts in a dominant-inhibitory fashion  
365 by blocking bridging between laminin and other extracellular matrix components, and interfering  
366 with full length nidogen binding to laminin (Pujuguet et al., 2000). We generated transgenic  
367 zebrafish which expressed lyn-mCherry as a reporter, as well as a viral 2A peptide upstream of  
368 either full-length zebrafish *nid1a* (Fig 8A, WT-Nid1a), or a truncated form of *nid1a* based on the  
369 mouse Nd-III fragment (Fig 8A, DI-Nid1a). By using heat-shock inducible transgenes, we were  
370 able to control the timing of expression of WT-Nid1a and DI-Nid1a, and by driving lyn-mCherry  
371 from the same transcript, we controlled for efficiency of heat shock by visualizing all cells which  
372 expressed the transgene (see Materials and Methods for full transgenic nomenclature).

373 We previously observed neural crest cells in contact with the optic vesicle as early as  
374 12.5 hpf (Fig 1), therefore we performed heat shock from 12-13 hpf to induce WT-Nid1a or DI-  
375 Nid1a expression at the onset of neural crest migration around the optic vesicle. We crossed  
376 zebrafish containing *hs:WT-Nid1a* or *hs:DI-Nid1a* transgenes with *Tg(bactin2:EGFP-CAAX)<sup>z200</sup>*  
377 transgenics; this enabled us to image the optic cups of *hs:WT-Nid1a* transgene-positive embryos  
378 which had not been heat shocked (Fig 8B, B') as a control. We found that ubiquitous  
379 overexpression of WT-Nid1a slightly, but significantly, impaired invagination ( $42.3\pm 1.7^\circ$ )  
380 compared to control embryos ( $46.8\pm 1.4^\circ$ ; Fig 8C, C', E), and subtly altered lens morphogenesis  
381 such that the resulting lens is not completely spherical. However, overexpression of DI-Nid1a  
382 significantly impaired invagination ( $32.3\pm 1.5^\circ$ ), resulting in striking phenotypes including a  
383 severely flattened neural retina and lens (Fig 8 D, D', E). To determine whether these phenotypes  
384 were due to effects on the optic cup itself or a secondary consequence of disruption to neural  
385 crest migration, we generated double transgenics with *sox10:GFP* and either *hs:WT-Nid1a* or  
386 *hs:DI-Nid1a* to visualize neural crest cells in the presence of WT-Nid1a or DI-Nid1a. We find  
387 that ubiquitous, heat shock-induced overexpression of WT-Nid1a or DI-Nid1a does not affect  
388 neural crest migration (Fig 8F, G). We conclude, therefore, that DI-Nid1a strongly impairs optic  
389 cup morphogenesis through direct effects on the optic vesicle.

390 To determine the effects of disrupting nidogen specifically expressed by the neural crest,  
391 we attempted to achieve neural crest-specific expression of either WT-Nid1a or DI-Nid1a by  
392 utilizing the Gal4/UAS system. We generated *UAS:WT-Nid1a* and *UAS:DI-Nid1a* transgenic  
393 lines and crossed each to *Tg(sox10:Gal4-VP16)<sup>el159</sup>* transgenic zebrafish (Das and Crump, 2012).  
394 Unlike ubiquitous, heat-shock induced overexpression, neural crest-specific overexpression of  
395 WT-Nid1a did not have an effect on optic cup morphogenesis (data not shown). While neural

396 crest-specific expression of DI-Nid1a (*sox10:Gal4-VP16;UAS:DI-Nid1a* double transgenic) led  
397 to obvious optic cup invagination defects, these embryos had very few or no neural crest cells in  
398 the vicinity of the eye (data not shown), either due to effects on neural crest survival or  
399 migration. Thus we were unable to distinguish the effects of DI-Nid1a directly on the eye from  
400 effects which arise due to loss of neural crest. We hypothesize that while a short burst of DI-  
401 Nid1a expression (such as when induced from 12-13 hpf via heat shock) does not impair neural  
402 crest formation or migration (Fig 8G), sustained expression of DI-Nid1a (as driven by the *sox10*  
403 promoter) impairs neural crest migration and/or survival, and thus we were unable to interpret  
404 the tissue-specific effects of DI-Nid1a expression from the neural crest.

405

#### 406 Nidogen can partially rescue *tfap2a;foxd3* double mutant optic cup phenotypes

407 Nidogen expression in the neural crest, coupled with the phenotypes we observed when  
408 we ubiquitously overexpressed DI-Nid1a, suggested that disruptions to nidogen's matrix  
409 bridging function might be the underlying cause of the morphogenesis defects we observed in  
410 mutants where neural crest cells are lost.

411 We sought to determine whether the optic cup morphogenesis defects we observed in the  
412 *tfap2a;foxd3* mutants might indeed be due to a lack of nidogen deposited by neural crest cells.  
413 Specifically, we wanted to determine whether expression of WT-Nid1a could rescue optic cup  
414 morphogenesis in *tfap2a;foxd3* double mutants. To test this, we ubiquitously overexpressed WT-  
415 Nid1a in *tfap2a;foxd3* double mutants where there would be no neural crest cells present to  
416 produce nidogen. We generated *tfap2a;foxd3* double mutants that contained both the *EGFP-*  
417 *CAAX* transgene, as well as the *hs:WT-Nid1a* transgene. In these embryos, we could visualize the  
418 optic cups of both unperturbed embryos, as well as those which were heat-shocked from 12-13



419 hpf. In control, non-heat shocked embryos (Fig 9A-B'), we observed retinal invagination defects  
420 in *tfap2a;foxd3* double mutants compared to their wildtype siblings (Fig 9E), consistent with our  
421 previous observations (Fig 2G). To our surprise, wildtype and *tfap2a;foxd3* mutant embryos that  
422 were heat shocked from 12-13 hpf looked phenotypically similar. The lenses in either genotype  
423 take on a similar, slightly ovoid appearance, and the nasal retina more fully enwraps the lens in  
424 *tfap2a;foxd3* mutants which overexpress WT-Nid1a, suggesting improved invagination over  
425 *tfap2a;foxd3* mutant eyes (Fig 9C-D'). When quantified, we indeed observe a significant  
426 improvement in the degree of invagination between *tfap2a;foxd3* double mutant eyes ( $36.8 \pm 1.6^\circ$ )  
427 and *tfap2a;foxd3* double mutants which ubiquitously overexpress WT-Nid1a ( $39.9 \pm 1.8^\circ$ ; Fig  
428 9E). Additionally, we did not detect a difference between heat shocked wildtype and  
429 *tfap2a;foxd3* embryos when quantifying invagination ( $39.6 \pm 0.7^\circ$  vs  $39.9 \pm 1.8^\circ$ , respectively; Fig  
430 9E). From this experiment, we conclude that supplying nidogen can partially bypass the effects  
431 of loss of neural crest on optic cup morphogenesis, and that ectopic expression of nidogen from  
432 the optic cup and surrounding tissues can partially rescue the invagination defects caused by loss  
433 of nidogen producing cells.

434

## 435 **Discussion**

### 436 Interactions with neural crest cells regulate optic cup morphogenesis

437 Crosstalk between developing tissues is critical for their proper morphogenesis and  
438 subsequent function. This theme is seen throughout organogenesis, with epithelial-mesenchymal  
439 interactions being of particular importance. Developing epithelia frequently require surrounding  
440 mesenchyme in order to acquire their mature, functional structures: the lung, kidney, salivary  
441 gland, and tooth placode are but a few examples where these interactions are critical (Bader et

442 al., 2005; Ekblom et al., 1994; Kadoya et al., 1997; Thesleff, 2003). In the eye, a complex  
443 mesenchyme is known to surround the developing optic cup, and mesenchymal cells contribute  
444 to later-developing optic tissues such as the hyaloid vasculature and structures within the anterior  
445 segment (Gage et al., 2005; James et al., 2016; Soules and Link, 2005; Sowden, 2007). Prior  
446 work has established that disruptions to the POM have profound effects on the developing optic  
447 cup, such as morphogenetic defects that stretch from the neural retina into the optic stalk and  
448 optic fissure (Bassett et al., 2010; Lupo et al., 2011). However, many of these analyses leave  
449 many questions unresolved, such as when or where defects arise within the optic cup. The POM  
450 is a heterogeneous cell population comprised of both neural crest and mesodermally-derived  
451 mesenchymal cells (Gage et al., 2005; Johnston et al., 1979), and specific molecular  
452 contributions from either tissue during early optic cup development are poorly understood. A  
453 recently published study using elegant ectopic optic vesicle transplants suggested that the POM  
454 was dispensable for early optic cup morphogenesis and only required for later stages of optic cup  
455 development, specifically the fusion of the optic fissure (Gestri et al., 2018). Here, using the  
456 zebrafish *tfap2a;foxd3* double mutant which displays a near complete loss of neural crest cells  
457 (Arduini et al., 2009; Wang et al., 2011), we demonstrate that the neural crest subpopulation of  
458 the POM regulates morphogenesis of the optic cup. Using live imaging, we visualize neural crest  
459 cells and find that they migrate around the optic vesicle throughout much of optic cup  
460 morphogenesis. Despite relatively mild gross morphological defects, 4-dimensional cell tracking  
461 reveals that neural crest cells are required for cell movements within optic vesicle. Specifically,  
462 proper RPE cell movements and rim involution depend on the presence of neural crest cells; in  
463 the absence of neural crest, cells which contribute to the nasal retina and RPE move significantly  
464 farther and faster than in the presence of neural crest. Most notable, however, is the dramatic loss

465 of basement membrane surrounding the RPE when neural crest is lost, which is likely to underlie  
466 these cell movement defects (Figure 10).

467         The POM has long been observed in close proximity with the developing optic cup, but  
468 its specific functions have remained elusive. One possible mechanism mesenchymal cells may  
469 use to drive optic cup morphogenesis is by modulating the signaling received by the optic vesicle  
470 during its development. Zebrafish *zic2a;2b* double mutants display disruptions to the pericocular  
471 neural crest, in addition to molecular and morphological hallmarks of expanded Hedgehog  
472 signaling within the optic cup (Sedykh et al., 2017); in *tfap2a;foxd3* double mutants however, we  
473 do not observe Pax2a (a Hh target gene) expression expanded in a manner consistent with  
474 disrupted Hh signaling. In chick, pericocular mesenchyme is required for RPE development in a  
475 seemingly TGF- $\beta$  dependent fashion (Fuhrmann et al., 2000). Using pSmad3 as a readout, we  
476 did not observe a difference in TGF- $\beta$  signaling in the optic cup in *tfap2a;foxd3* double mutants;  
477 additionally, neural crest cells are not required for the development of RPE in zebrafish, as we  
478 observed pigment granule formation by electron microscopy at 24 hpf, and obvious pigmentation  
479 of *tfap2a;foxd3* mutant eyes at 52 hpf. It is possible that that the mesodermal mesenchyme is  
480 sufficient for TGF- $\beta$  signaling to the optic cup and RPE induction, or that RPE development  
481 could be regulated through different mechanisms in the zebrafish versus the chick. In the future,  
482 it will be interesting to dissect the specific roles of the mesodermal mesenchyme in optic cup  
483 morphogenesis.

484         An alternative explanation for the phenotypes we observe in the *tfap2a;foxd3* double  
485 mutants is that loss of either gene could affect other surrounding tissues in close proximity to the  
486 eye, in addition to their well-characterized effects on the neural crest. *tfap2a* in particular is  
487 expressed in the overlying ectoderm during optic cup morphogenesis (Bassett et al., 2010;

488 Knight et al., 2005). As such, its loss could affect some aspect of the optic cup morphogenesis  
489 through a neural crest-independent effect. However, both *tfap2a* and *foxd3* single mutants  
490 display optic cup morphogenesis defects that are less severe than those we observe in the  
491 *tfap2a;foxd3* double mutant. In addition, the lens placode is the sole optic tissue where *tfap2a* is  
492 expressed during optic cup morphogenesis stages, yet the lens is morphologically normal in each  
493 of these mutants. Further, we observe disruptions to basement membrane formation along the  
494 surface of the RPE which is in direct contact with neural crest cells, but normal basement  
495 membrane formation at the basal surface of the retina and lens. These observations suggest that  
496 the optic cup morphogenesis defects we observe in the *tfap2a;foxd3* double mutants are  
497 primarily due to loss of neural crest cells rather than effects on other surrounding tissues.

498

#### 499 Neural crest cells promote morphogenesis through ECM assembly

500 Several studies have implicated the ECM surrounding the optic vesicle as a key player in  
501 driving optic cup morphogenesis. Fibronectin appears to be critical for formation of the lens  
502 (Hayes et al., 2012; Huang et al., 2011), and in retinal organoid culture, the minimal mixture of  
503 components needed to elicit optic cup morphogenesis are nodal (a TGF- $\beta$  ligand) and the ECM  
504 components laminin-1 and nidogen (Eiraku et al., 2011). Laminin is required for proper cell  
505 adhesion of the optic vesicle to the ECM, and disruptions to these adhesions impairs  
506 establishment of apicobasal polarity and subsequent morphogenesis (Bryan et al., 2016;  
507 Ivanovitch et al., 2013; Nicolás-Pérez et al., 2016; Sidhaye and Norden, 2017). Taken together,  
508 these data indicate that the ECM is a critical regulator in formation of the optic cup, and the  
509 individual components which comprise the ECM each may regulate specific, non-overlapping  
510 aspects of this morphogenetic process.

511 Further, the dynamics of ECM component production, deposition, and interaction may  
512 play a key role in regulating cell movements. Using electron microscopy, we observe a spatially  
513 specific, dramatic disruption of basement membrane formation when neural crest is lost. This has  
514 allowed us the opportunity to determine the effect of disrupting ECM assembly in a limited  
515 domain, without loss of key the basement membrane component laminin. The gross morphology  
516 of the optic cup is mildly but reproducibly abnormal, although cell movements in contact with  
517 that particular ECM domain are clearly disrupted. We speculate that the intact basement  
518 membrane in other parts of the eye is sufficient to support other cell movements underlying optic  
519 cup morphogenesis. That being said, comparison of this phenotype with other mutants which  
520 disrupt ECM components reveals some notable findings: for example, loss of laminin leads to  
521 significant cell death in the prospective RPE domain (Bryan et al., 2016); impairment of  
522 basement membrane formation through genetic loss of neural crest cells does not. Further  
523 examination of these phenotypes will allow us to identify functions of ECM components that are  
524 specifically dependent upon basement membrane assembly. It is also interesting to consider that  
525 cells within the developing RPE may rely on the mechanical properties of the surrounding  
526 basement membrane in order to migrate and develop correctly. The Hippo signaling pathway is a  
527 major cellular mechanotransducer which can function in response to ECM stiffness (Chakraborty  
528 et al., 2017), and RPE development is dependent on Yap and Taz, the transcriptional coactivators  
529 of the Hippo pathway (Miesfeld et al., 2015). Although RPE development appears normal  
530 without assembled basement membrane, it is a tantalizing possibility that Hippo signaling could  
531 serve as a molecular link between the basement membrane and optic vesicle cell behaviors.

532 Although the role of nidogen in other organ systems has been previously investigated, its  
533 roles in optic cup morphogenesis has remained elusive until now. While nidogens are ubiquitous

534 components of basement membranes, the mesenchymal cells in the embryonic lung and kidney  
535 are those tissues' sole source of nidogens (Ekblom et al., 1994; Kadoya et al., 1997; Senior et al.,  
536 1996). Disruptions to nidogen function, either through blocking antibodies or loss-of-function  
537 mutations, impedes epithelial morphogenesis of the lung, kidney and developing limb (Bader et  
538 al., 2005; Böse et al., 2006; Ekblom et al., 1994; Kadoya et al., 1997). Here, we demonstrate that  
539 neural crest cells produce the nidogen which is deposited along the basal surface of the RPE, and  
540 that neural crest cells are required for proper assembly of the basement membrane along this  
541 surface. Impairing nidogen function, either through loss of neural crest cells or through  
542 expression of a dominant-interfering form of Nid1a, leads to defects in optic cup morphogenesis.  
543 Intriguingly, ubiquitous overexpression of full-length Nid1a also causes slight defects in optic  
544 cup invagination, suggesting that an optimal level of nidogen is required for proper ECM  
545 function. Consistent with this, loss of the nidogen-binding site in the laminin  $\gamma$ 1 chain results in  
546 higher penetrance of renal defects than when both nidogen 1 and 2 are lost (Bader et al., 2005;  
547 Willem et al., 2002); this was predicted to be due to an increase of free nidogen incapable of  
548 binding to laminin, which could sequester other components of the ECM and interfere with other  
549 matrix interactions (Bader et al., 2005).

550         How the addition of nidogen to the ECM surrounding the optic cup promotes the  
551 morphogenetic movements required for optic cup morphogenesis is unclear. While both laminin  
552 and fibronectin were still detectable around the RPE in the absence of neural crest cells, we did  
553 not detect a normal basement membrane at this site. This finding is consistent with mouse  
554 nidogen mutants which show similar basement membrane defects around the developing kidney,  
555 lung, and heart, despite retention of other ECM components (Bader et al., 2005). Proper  
556 attachment to the ECM is required for many aspects of optic cup morphogenesis including RPE

557 cell movements and rim involution (Bryan et al., 2016; Hayes et al., 2012; Martinez-Morales et  
558 al., 2009; Sidhaye and Norden, 2017), two processes which we show to be disrupted in the  
559 absence of neural crest. We propose that through deposition of nidogen into the ECM, neural  
560 crest cells generate a restrictive environment which enables the correct movements of RPE cells  
561 and migration of the cells which move around the rim of the optic vesicle and into the  
562 developing neural retina; the basement membrane surrounding the RPE serves as a handbrake  
563 which slows optic vesicle cell movements and ensures their migration to the correct place at the  
564 correct time during optic cup morphogenesis. Disruptions to nidogen function, either through  
565 loss of neural crest cells, expression of a dominant-interfering form of nidogen, or  
566 overexpression of wildtype nidogen, lead to defects in optic cup morphogenesis. It will be  
567 interesting to investigate whether cells in the developing optic cup can still properly adhere to the  
568 remaining ECM components in the absence of neural crest cells. Further, growth factors and  
569 signaling molecules such as FGFs and BMPs are regulated through deposition into the ECM, and  
570 correct assembly of the basement membrane may be required to properly regulate these signaling  
571 pathways during optic cup morphogenesis; these will be interesting signaling pathways to  
572 investigate in the context of disrupted basement membrane assembly.

## 573 **Materials and methods**

### 574 *Zebrafish lines*

575 Embryos from the following mutant and transgenic lines were raised at 28.5°C and  
576 staged according to hours post fertilization and morphology (Kimmel et al., 1995).

### 577 Mutant alleles:

578 *tfap2a<sup>ts213</sup>;foxd3<sup>zdf10</sup>* (Arduini et al., 2009). The *alyron<sup>z24</sup>* allele contains a C to A transversion in  
579 the coding sequence of the *pafl* gene, resulting in a premature stop mutation at tyrosine 281  
580 (Y281\*) (Mick Juryneec and David Grunwald, personal communication).

### 581 Transgenic alleles:

582 *Tg(sox10:memRFP)<sup>vu234</sup>* (Kirby et al., 2006), *Tg(sox10:GFP)<sup>ba4</sup>* (Dutton et al., 2008),  
583 *Tg(bactin2:EGFP-CAAX)<sup>z200</sup>*, *Tg(hsp70:lyn-mCherry-2A-WT-Nid1a)<sup>z202</sup>*, *Tg(hsp70:lyn-*  
584 *mCherry-2A-DI-Nid1a)<sup>z203</sup>*.

585

### 586 *Construction of Nid1a transgenic lines*

587 *Tg(hsp70:lyn-mCherry-2A-WT-Nid1a)*, a.k.a. *hs:WT-Nid1a* and *Tg(hsp70:lyn-mCherry-*  
588 *2A-DI-Nid1a)*, a.k.a. *hs:DI-Nid1a* were generated using Gateway (Invitrogen, Carlsbad, CA)  
589 recombination. IMAGE Clone ID 8000296 (GE Dharmacon, Chicago, IL) was used as the  
590 template to PCR amplify cDNAs encoding wildtype and dominant-interfering Nid1a, these were  
591 ligated into pCS2FA prior to Gateway cloning. PCR primers were used to introduce the PTV-2A  
592 peptide (Provost et al., 2007) on the 5' end, and the SV40 late poly-adenylation signal on the 3'  
593 end of the zebrafish *nid1a* cDNA. Gateway 3' entry clones were generated via BP recombination  
594 and subsequently LR recombined into the pDEST-Tol2-CG2 destination vector which contains  
595 an *myl7:EGFP* expression cassette as a transgenesis marker (Kwan et al., 2007). 25 pg plasmid



596 DNA was microinjected along with 50 pg mRNA encoding Tol2 transposase into single-cell  
597 wildtype embryos and screened for *myl7:EGFP* expression. Fluorescent embryos were raised to  
598 adulthood and outcrossed to generate stable transgenic lines.

599

#### 600 *Heat shocks*

601 Embryos were transferred from a 28.5°C incubator and immediately overlaid with fresh,  
602 preheated 39°C E3. Embryos were incubated at 39°C for one hour on an Echotherm heating plate  
603 (Torrey Pines Scientific, Carlsbad, CA). Embryos were then transferred back to a 28.5°C  
604 incubator and grown to the indicated stage.

605

#### 606 *Allele identification/genotyping*

607 All mutant alleles were PCR genotyped using either CAPS or dCAPS techniques (Neff et al.,  
608 1998). *tfap2a<sup>ts213</sup>*: Forward (5'-CGCTCAGGTCTTATAAATAGGCTACTAATAATGTTAC-  
609 3'), Reverse (5'-CTGAGAGGTGGCTATTTCCCGTTAAGATTCG-3'), mutant allele is cut  
610 with BspI.

611 *foxd3<sup>zdf10</sup>*: dCAPS Forward (5'-

612 CGACTGCTTCGTCAAGATCCCACGGGAACCGGGCAACCCGGGCAAAGGCAACTACT

613 GGACCCTCGACCCCCAGTCGGAAAATAT-3'), Reverse (5'-

614 CAGGGGGAATGTACGGGTACTGC-3'), mutant allele is cut with SspI.

615 *paf1<sup>z24</sup>*: Forward (5'-G TTCAGAGGTATGATGGATGAGG-3'), Reverse (5'-

616 GTATGCAGCTTTATGAAAACACTC-3'), wildtype band is cut with NspI.

617 *RNA synthesis and injections*

618 Capped mRNAs were synthesized using linearized pCS2 templates (pCS2-EGFP-CAAX,  
619 pCS2FA-H2A.F/Z-mCherry), the mMessage mMachine SP6 kit (AM1340, Invitrogen), purified  
620 using the Qiagen RNeasy Mini Kit (Qiagen, Hilden, Germany) and ethanol precipitated. 150-250  
621 pg of each mRNA were microinjected into the cell of one-cell stage embryos. EGFP-CAAX  
622 mRNA was injected to visualize cell membranes, H2A.F/Z-mCherry mRNA was injected to  
623 visualize nuclei.

624

625 *Antibody staining*

626 Embryos were fixed at the indicated stage in 4% paraformaldehyde, permeabilized in  
627 PBST (PBS+0.5% Triton X-100), and blocked in PBST + 2% bovine serum albumin. Antibodies  
628 and concentrations are as follows: anti-Pax2a (GTX128127, Genetex, Irvine, CA), 1:200; anti-  
629 pSmad3 (ab52903, Abcam, Cambridge, MA), 1:200; anti-Nidogen/Entactin (ab14511, Abcam),  
630 1:100; anti-Laminin 1 (L9393, Sigma, St. Louis, MO), 1:100; anti-Fibronectin (F3648, Sigma),  
631 1:100; anti-GFP (A10262, Invitrogen), 1:200. Secondary antibodies used were Alexa Fluor 488  
632 goat anti-mouse (A-11001, Invitrogen), Alexa Fluor 488 goat anti-rabbit (A-11008, Invitrogen),  
633 Alexa Fluor 488 goat anti-chicken (A-11039, Invitrogen) and incubated at 1:200. Nuclei were  
634 detected by incubation with 1  $\mu$ M TOPRO-3 iodide (T3605, Invitrogen). Embryos were cleared  
635 through a series of 30%/50%/70% glycerol (in PBS) prior to imaging.

636

637 *In situ hybridization*

638 Embryos were fixed at the indicated stage in 4% paraformaldehyde overnight at 4°C and  
639 dehydrated in 100% methanol. Color *in situ* hybridizations were performed similar to (Thisse

640 and Thisse, 2008). Fluorescent *in situ* hybridizations were carried out as described previously  
641 (Lauter et al., 2014; Leerberg et al., 2017). Anti-GFP labeling and detection was performed after  
642 *in situ* hybridization and tyramide signal amplification.

643 In situ probes were synthesized from linearized pBluescript II SK+ templates (pBSII-  
644 Nid1a, pBSII-Nid1b, pBSII-Nid2a, pBSII-Nid2b) using T3 or T7 polymerases and DIG labeling  
645 mix (11277073910, Roche, Basel, Switzerland). All four probe sequences were synthesized (IDT  
646 gBlocks, IDT, San Jose, CA) and ligated into pBluescript II SK+.

647

#### 648 *Light Microscopy*

649 For timelapse imaging, 12 hpf embryos were embedded in 1.6% low-melt agarose (in E3)  
650 in DeltaT dishes (Biotechs, #0420041500 C), E3 was overlaid and the dish covered to prevent  
651 evaporation. For antibody stained or fluorescent *in situ* hybridization imaging, embryos were  
652 embedded in 1% low-melt agarose (in PBS) in Pelco glass-bottom dishes (#14027, Ted Pella,  
653 Redding, CA), PBS was overlaid to prevent evaporation.

654 Confocal images were acquired using a Zeiss LSM710 laser scanning confocal  
655 microscope. For timelapse imaging, datasets were acquired using the following parameters: 63 z-  
656 sections, 2.10  $\mu\text{m}$  z-step, 40x water-immersion objective (1.2 NA). Time between z-stacks was 3  
657 minutes 30 seconds (Movies S1, S2), 2 minutes 45 seconds (Movies S4, S6, S8), and 2 minutes  
658 30 seconds (Movies S5, S7, S9). For all timelapse and antibody imaging, datasets were acquired  
659 without knowledge of embryo genotype. Embryos were de-embedded and genotyped after  
660 imaging was completed.

661 Brightfield images were acquired using an Olympus SZX16 stereomicroscope with either  
662 an Olympus DP26 or UC90 camera.

663 *Transmission Electron Microscopy*

664 24 hpf embryos were fixed, stained and embedded using the microwave-assisted tissue  
665 processing protocol described in (Czopka and Lyons, 2011). Tails were dissected from embryos  
666 prior to fixation and used for genotyping.

667 Our tissue sampling and analytical techniques have been described previously in detail  
668 (Anderson et al., 2011a, 2011b; Lauritzen et al., 2013; Marc et al., 2013, 2014).

669 The tissues were osmicated for 60 min in 0.5% OsO<sub>4</sub> in 0.1 M cacodylate buffer,  
670 processed in maleate buffer for en bloc staining with uranyl acetate, and processed for resin  
671 embedding. The epoxy resin bloc with zebrafish tissue was sectioned in the horizontal plane at  
672 70–90 nm onto polyvinyl formal resin coated copper slot grids for transmission electron  
673 microscopy (TEM) (Lauritzen et al., 2013; Marc and Jones, 2002).

674 Each TEM section was imaged on a JEOL JEM-1400 transmission electron microscope  
675 at 20,000x and stored in 16- and 8-bit versions, as well as image pyramids of optimized tiles for  
676 web visualization with the Viking viewer (Anderson et al., 2011a, 2011b). Each image was  
677 captured as an array of image tiles at roughly 500-800 tiles/slice with 15% overlap.

678

679 *Image processing and analysis*

680 Images were processed using ImageJ. Volume rendering was performed using  
681 FluoRender (Wan et al., 2009, 2017). For lateral view 3D rendering of the optic cup, the  
682 ectoderm was digitally erased in ImageJ prior to visualization in FluoRender. Invagination  
683 angles were measured as previously described (Bryan et al., 2016) and shown in Fig 2G.  
684 Individual cell tracking was performed as described in (Kwan et al., 2012) using LongTracker;  
685 nuclei were visualized using H2A.F/Z-mCherry.

686

687 **Acknowledgements**

688 We are grateful to Rodney Stewart, David Grunwald, and Mick Juryneec for reagents, and the  
689 University of Utah Centralized Zebrafish Animal Resource for zebrafish husbandry. Thanks to  
690 members of the Kwan lab for useful discussions and critical reading of the manuscript. This  
691 work was supported by grants from the NEI/NIH to K. M. K. (R01 EY025378, R01 EY025780),  
692 to B. W. J. (R01 EY015128), and to the Moran Eye Center Vision Core (P30 EY014800). C. D.  
693 B. was supported by the University of Utah Developmental Biology Training Grant (NIH  
694 T32HD007491).

## 695   **References**

- 696   Akanuma, T., Koshida, S., Kawamura, A., Kishimoto, Y., and Takada, S. (2007). Paf1 complex  
697   homologues are required for Notch-regulated transcription during somite segmentation. *EMBO*  
698   *Rep.* *8*, 858–863.
- 699   Anderson, J.R., Jones, B.W., Watt, C.B., Shaw, M. V., Yang, J.H., Demill, D., Lauritzen, J.S.,  
700   Lin, Y., Rapp, K.D., Mastronarde, D., et al. (2011a). Exploring the retinal connectome. *Mol Vis*  
701   *17*, 355–379.
- 702   Anderson, J.R., Mohammed, S., Grimm, B., Jones, B.W., Koshevoy, P., Tasdizen, T., Whitaker,  
703   R., and Marc, R.E. (2011b). The Viking viewer for connectomics: Scalable multi-user annotation  
704   and summarization of large volume data sets. *J. Microsc.* *241*, 13–28.
- 705   Arduini, B.L., Bosse, K.M., and Henion, P.D. (2009). Genetic ablation of neural crest cell  
706   diversification. *Development* *136*, 1987–1994.
- 707   Bader, B.L., Smyth, N., Nedbal, S., Baranowsky, A., Mokkaapati, S., Miosge, N., Murshed, M.,  
708   Nischt, R., Baranowsky, A., Mokkaapati, S., et al. (2005). Compound Genetic Ablation of  
709   Nidogen 1 and 2 Causes Basement Membrane Defects and Perinatal Lethality in Mice. *Mol.*  
710   *Cell. Biol.* *25*, 6846–6856.
- 711   Bassett, E.A., Williams, T., Zacharias, A.L., Gage, P.J., Fuhrmann, S., and West-Mays, J.A.  
712   (2010). AP-2a knockout mice exhibit optic cup patterning defects and failure of optic stalk  
713   morphogenesis. *Hum. Mol. Genet.* *19*, 1791–1804.
- 714   Bohsack, B.L., Kasprick, D.S., Kish, P.E., Goldman, D., and Kahana, A. (2012). A zebrafish  
715   model of Axenfeld-Rieger syndrome reveals that pitx2 regulation by Retinoic Acid is essential  
716   for ocular and craniofacial development. *Investig. Ophthalmol. Vis. Sci.* *53*, 7–22.
- 717   Böse, K., Nischt, R., Page, A., Bader, B.L., Paulsson, M., and Smyth, N. (2006). Loss of  
718   nidogen-1 and -2 results in syndactyly and changes in limb development. *J. Biol. Chem.* *281*,  
719   39620–39629.
- 720   Bryan, C.D., Chien, C. Bin, and Kwan, K.M. (2016). Loss of laminin alpha 1 results in multiple  
721   structural defects and divergent effects on adhesion during vertebrate optic cup morphogenesis.  
722   *Dev. Biol.* *416*, 324–337.
- 723   Chakraborty, S., Njah, K., Pobbati, A. V., Lim, Y.B., Raju, A., Lakshmanan, M., Tergaonkar, V.,  
724   Lim, C.T., and Hong, W. (2017). Agrin as a Mechanotransduction Signal Regulating YAP  
725   through the Hippo Pathway. *Cell Rep.* *18*, 2464–2479.
- 726   Cretokos, C.J., and Grunwald, D.J. (1999). Alyron, an Insertional Mutation Affecting Early  
727   Neural Crest Development in Zebrafish. *Dev. Biol.* *210*, 322–338.
- 728   Czopka, T., and Lyons, D.A. (2011). Dissecting Mechanisms of Myelinated Axon Formation  
729   Using Zebrafish. In *The Zebrafish: Disease Models and Chemical Screens*, (Elsevier Inc.), pp.  
730   25–62.
- 731   Das, A., and Crump, J.G. (2012). Bmps and Id2a act upstream of twist1 to restrict  
732   ectomesenchyme potential of the cranial neural crest. *PLoS Genet.* *8*.
- 733   Dong, L.J., and Chung, A.E. (1991). The Expression of the Genes for Entactin, Laminin-a,  
734   Laminin-B1 and Laminin-B2 in Murine Lens Morphogenesis and Eye Development.  
735   *Differentiation* *48*, 157–172.
- 736   Dutton, J.R., Antonellis, A., Carney, T.J., Rodrigues, F.S., Pavan, W.J., Ward, A., and Kelsh,  
737   R.N. (2008). An evolutionarily conserved intronic region controls the spatiotemporal expression  
738   of the transcription factor Sox10. *BMC Dev. Biol.* *8*, 105.
- 739   Eberhart, J.K., He, X., Swartz, M.E., Yan, Y.L., Song, H., Boling, T.C., Kunerth, A.K., Walker,

- 740 M.B., Kimmel, C.B., and Postlethwait, J.H. (2008). MicroRNA Mirn140 modulates Pdgf  
741 signaling during palatogenesis. *Nat. Genet.* *40*, 290–298.
- 742 Eiraku, M., Takata, N., Ishibashi, H., Kawada, M., Sakakura, E., Okuda, S., Sekiguchi, K.,  
743 Adachi, T., and Sasai, Y. (2011). Self-organizing optic-cup morphogenesis in three-dimensional  
744 culture. *Nature* *472*, 51–56.
- 745 Ekblom, P., Ekblom, M., Fecker, L., Klein, G., Zhang, H.Y., Kadoya, Y., Chu, M.L., Mayer, U.,  
746 and Timpl, R. (1994). Role of mesenchymal nidogen for epithelial morphogenesis in vitro.  
747 *Development* *120*, 2003–2014.
- 748 Fox, J.W., Mayer, U., Nischt, R., Aumailley, M., Reinhardt, D., Wiedemann, H., Mann, K.,  
749 Timpl, R., Krieg, T., and Engel, J. (1991). Recombinant nidogen consists of three globular  
750 domains and mediates binding of laminin to collagen type IV. *EMBO J.* *10*, 3137–3146.
- 751 Fuhrmann, S., Levine, E.M., and Reh, T.A. (2000). Extraocular mesenchyme patterns the optic  
752 vesicle during early eye development in the embryonic chick. *Development* *127*, 4599–4609.
- 753 Gage, P.J., Rhoades, W., Prucka, S.K., and Hjalt, T. (2005). Fate maps of neural crest and  
754 mesoderm in the mammalian eye. *Investig. Ophthalmol. Vis. Sci.* *46*, 4200–4208.
- 755 Gestri, G., Osborne, R.J., Wyatt, A.W., Gerrelli, D., Gribble, S., Stewart, H., Fryer, A., Bunyan,  
756 D.J., Prescott, K., Collin, J.R.O., et al. (2009). Reduced TFAP2A function causes variable optic  
757 fissure closure and retinal defects and sensitizes eye development to mutations in other  
758 morphogenetic regulators. *Hum. Genet.* *126*, 791–803.
- 759 Gestri, G., Bazin-Lopez, N., Scholes, C., and Wilson, S.W. (2018). Cell Behaviors during  
760 Closure of the Choroid Fissure in the Developing Eye. *Front. Cell. Neurosci.* *12*, 1–12.
- 761 Grocott, T., Johnson, S., Bailey, A.P., and Streit, A. (2011). Neural crest cells organize the eye  
762 via TGF- $\beta$  and canonical Wnt signalling. *Nat. Commun.* *2*, 266–269.
- 763 Hayes, J.M., Hartsock, A., Clark, B.S., Napier, H.R.L., Link, B.A., and Gross, J.M. (2012).  
764 Integrin 5/Fibronectin1 and focal adhesion kinase are required for lens fiber morphogenesis in  
765 zebrafish. *Mol. Biol. Cell* *23*, 4725–4738.
- 766 Heermann, S., Schütz, L., Lemke, S., Krieglstein, K., and Wittbrodt, J. (2015). Eye  
767 morphogenesis driven by epithelial flow into the optic cup facilitated by modulation of bone  
768 morphogenetic protein. *Elife* *4*, 1–17.
- 769 Hendrix, R.W., and Zwaan, J. (1975). The matrix of the optic vesicle-presumptive lens interface  
770 during induction of the lens in the chicken embryo. *J. Embryol. Exp. Morphol.* *33*, 1023–1049.
- 771 Hero, I. (1990). Optic fissure closure in the normal cinnamon mouse: An ultrastructural study.  
772 *Investig. Ophthalmol. Vis. Sci.* *31*, 197–216.
- 773 Hero, I., Farjah, M., and Scholtz, C.L. (1991). The prenatal development of the optic fissure in  
774 colobomatous microphthalmia. *Investig. Ophthalmol. Vis. Sci.* *32*, 2622–2635.
- 775 Hilfer, S.R. (1983). Development of the eye of the chick embryo. *Scan. Electron Microsc.* 1353–  
776 1369.
- 777 Huang, J., Rajagopal, R., Liu, Y., Dattilo, L.K., Shaham, O., Ashery-Padan, R., and Beebe, D.C.  
778 (2011). The mechanism of lens placode formation: A case of matrix-mediated morphogenesis.  
779 *Dev. Biol.* *355*, 32–42.
- 780 Ivanovitch, K., Cavodeassi, F., and Wilson, S.W. (2013). Precocious acquisition of  
781 neuroepithelial character in the eye field underlies the onset of eye morphogenesis. *Dev. Cell* *27*,  
782 293–305.
- 783 James, A., Lee, C., Williams, A.M., Angileri, K., Lathrop, K.L., and Gross, J.M. (2016). The  
784 hyaloid vasculature facilitates basement membrane breakdown during choroid fissure closure in  
785 the zebrafish eye. *Dev. Biol.* *419*, 262–272.



- 786 Johnston, M.C., Noden, D.M., Hazelton, R.D., Coulombre, J.L., and Coulombre, A.J. (1979).  
787 Origins of avian ocular and periocular tissues. *Exp. Eye Res.* 29, 27–43.
- 788 Kadoya, Y., Salmivirta, K., Talts, J.F., Kadoya, K., Mayer, U., Timpl, R., and Ekblom, P.  
789 (1997). Importance of nidogen binding to laminin  $\gamma$ 1 for branching epithelial morphogenesis of  
790 the submandibular gland. *Development* 124, 683–691.
- 791 Kheradmand, F., Rishi, K., and Werb, Z. (2002). Signaling through the EGF receptor controls  
792 lung morphogenesis in part by regulating MT1-MMP-mediated activation of gelatinase  
793 A/MMP2. *J. Cell Sci.* 115, 839–848.
- 794 Kimmel, C.B., Ballard, W.W., Kimmel, S.R., Ullmann, B., and Schilling, T.F. (1995). Stages of  
795 embryonic development of the zebrafish. *Dev. Dyn.* 203, 253–310.
- 796 Kirby, B.B., Takada, N., Latimer, A.J., Shin, J., Carney, T.J., Kelsh, R.N., and Appel, B. (2006).  
797 In vivo time-lapse imaging shows dynamic oligodendrocyte progenitor behavior during zebrafish  
798 development. *Nat. Neurosci.* 9, 1506–1511.
- 799 Knight, R.D., Javidan, Y., Zhang, T., Nelson, S., and Schilling, T.F. (2005). AP2-dependent  
800 signals from the ectoderm regulate craniofacial development in the zebrafish embryo.  
801 *Development* 132, 3127–3138.
- 802 Kudoh, T., Tsang, M., Hukriede, N.A., Chen, X., Dedekian, M., Clarke, C.J., Kiang, A., Schultz,  
803 S., Epstein, J.A., Toyama, R., et al. (2001). A gene expression screen in zebrafish  
804 embryogenesis. *Genome Res.* 11, 1979–1987.
- 805 Kwan, K.M. (2014). Coming into focus: The role of extracellular matrix in vertebrate optic cup  
806 morphogenesis. *Dev. Dyn.* 243, 1242–1248.
- 807 Kwan, K.M., Fujimoto, E., Grabher, C., Mangum, B.D., Hardy, M.E., Campbell, D.S., Parant,  
808 J.M., Yost, H.J., Kanki, J.P., and Chien, C. Bin (2007). The Tol2kit: A multisite gateway-based  
809 construction Kit for Tol2 transposon transgenesis constructs. *Dev. Dyn.* 236, 3088–3099.
- 810 Kwan, K.M., Otsuna, H., Kidokoro, H., Carney, K.R., Saijoh, Y., and Chien, C.-B. (2012). A  
811 complex choreography of cell movements shapes the vertebrate eye. *Development* 139, 359–372.
- 812 Langenbacher, A.D., Nguyen, C.T., Cavanaugh, A.M., Huang, J., Lu, F., and Chen, J.N. (2011).  
813 The PAF1 complex differentially regulates cardiomyocyte specification. *Dev. Biol.* 353, 19–28.
- 814 Langenberg, T., Kahana, A., Wszalek, J.A., and Halloran, M.C. (2008). The eye organizes neural  
815 crest cell migration. *Dev. Dyn.* 237, 1645–1652.
- 816 Lauritzen, J.S., Anderson, J.R., Jones, B.W., Watt, C.B., Mohammed, S., Hoang, J. V., and  
817 Marc, R.E. (2013). ON Cone Bipolar Cell Axonal Synapses in the OFF Inner Plexiform Layer of  
818 the Rabbit Retina. *J. Comp. Neurol.* 521, 977–1000.
- 819 Lauter, G., Söll, I., and Hauptmann, G. (2014). Sensitive Whole-Mount Fluorescent In Situ  
820 Hybridization in Zebrafish Using Enhanced Tyramide Signal Amplification. *Methods Mol. Biol.*  
821 1082, 175–185.
- 822 Lee, J., Willer, J.R., Willer, G.B., Smith, K., Gregg, R.G., and Gross, J.M. (2008). Zebrafish  
823 blowout provides genetic evidence for Patched1-mediated negative regulation of Hedgehog  
824 signaling within the proximal optic vesicle of the vertebrate eye. *Dev. Biol.* 319, 10–22.
- 825 Leerberg, D.M., Sano, K., and Draper, B.W. (2017). Fibroblast growth factor signaling is  
826 required for early somatic gonad development in zebrafish. *PLOS Genet.* 1–28.
- 827 Li, W., and Cornell, R.A. (2007). Redundant activities of Tfp2a and Tfp2c are required for  
828 neural crest induction and development of other non-neural ectoderm derivatives in zebrafish  
829 embryos. *Dev. Biol.* 304, 338–354.
- 830 Li, Z., Joseph, N.M., and Easter, S.S. (2000). The morphogenesis of the zebrafish eye, including  
831 a fate map of the optic vesicle. *Dev. Dyn.* 218, 175–188.



- 832 Lupo, G., Gestri, G., O'Brien, M., Denton, R.M., Chandraratna, R.A.S., Ley, S. V, Harris, W.A.,  
833 and Wilson, S.W. (2011). Retinoic acid receptor signaling regulates choroid fissure closure  
834 through independent mechanisms in the ventral optic cup and periocular mesenchyme. *Proc.*  
835 *Natl. Acad. Sci. U. S. A.* *108*, 8698–8703.
- 836 Marc, R.E., and Jones, B.W. (2002). Molecular phenotyping of retinal ganglion cells. *J.*  
837 *Neurosci.* *22*, 413–427.
- 838 Marc, R.E., Jones, B.W., Watt, C.B., Anderson, J.R., Sigulinsky, C., and Lauritzen, S. (2013).  
839 Retinal connectomics: Towards complete, accurate networks. *Prog. Retin. Eye Res.* *37*, 141–162.
- 840 Marc, R.E., Anderson, J.R., Jones, B.W., Sigulinsky, C.L., and Lauritzen, J.S. (2014). The AII  
841 amacrine cell connectome: a dense network hub. *Front. Neural Circuits* *8*, 1–13.
- 842 Martinez-Morales, J.R., Rembold, M., Greger, K., Simpson, J.C., Brown, K.E., Quiring, R.,  
843 Pepperkok, R., Martin-Bermudo, M.D., Himmelbauer, H., and Wittbrodt, J. (2009). Ojoplano-  
844 mediated basal constriction is essential for optic cup morphogenesis. *Development* *136*, 2165–  
845 2175.
- 846 Miesfeld, J.B., Gestri, G., Clark, B.S., Flinn, M.A., Poole, R.J., Bader, J.R., Besharse, J.C.,  
847 Wilson, S.W., and Link, B.A. (2015). Yap and Taz regulate retinal pigment epithelial cell fate.  
848 *Development* *142*, 3021–3032.
- 849 Neff, M.M., Neff, J.D., Chory, J., and Pepper, A.E. (1998). dCAPS, a simple technique for the  
850 genetic analysis of single nucleotide polymorphisms: experimental applications in *Arabidopsis*  
851 *thaliana* genetics. *Plant J.* *14*, 387–392.
- 852 Nelson, D.A., and Larsen, M. (2015). Heterotypic control of basement membrane dynamics  
853 during branching morphogenesis. *Dev. Biol.* *401*, 103–109.
- 854 Nguyen, C.T., Langenbacher, A., Hsieh, M., and Chen, J.N.O. (2010). The PAF1 complex  
855 component Leol is essential for cardiac and neural crest development in zebrafish. *Dev. Biol.*  
856 *341*, 167–175.
- 857 Nicolás-Pérez, M., Kuchling, F., Letelier, J., Polvillo, R., Wittbrodt, J., and Martínez-Morales,  
858 J.R. (2016). Analysis of cellular behavior and cytoskeletal dynamics reveal a constriction  
859 mechanism driving optic cup morphogenesis. *Elife* *5*, 1–24.
- 860 Peterson, P.E., Pow, C.S., Wilson, D.B., and Hendrickx, A.G. (1995). Localisation of  
861 glycoproteins and glycosaminoglycans during early eye development in the macaque. *J. Anat.*  
862 *186 (Pt 1)*, 31–42.
- 863 Picker, A., Cavodeassi, F., Machate, A., Bernauer, S., Hans, S., Abe, G., Kawakami, K., Wilson,  
864 S.W., and Brand, M. (2009). Dynamic coupling of pattern formation and morphogenesis in the  
865 developing vertebrate retina. *PLoS Biol.* *7*.
- 866 Provost, E., Rhee, J., and Leach, S.D. (2007). Viral 2A peptides allow expression of multiple  
867 proteins from a single ORF in transgenic zebrafish embryos. *Genesis* *45*, 625–629.
- 868 Pujuguet, P., Simian, M., Liaw, J., Timpl, R., Werb, Z., and Bissell, M.J. (2000). Nidogen-1  
869 regulates laminin-1-dependent mammary-specific gene expression. *J. Cell Sci.* *113*, 849–858.
- 870 Reinhardt, D., Mann, K., Nischt, R., Fox, J.W., Chu, M.L., Krieg, T., and Timpl, R. (1993).  
871 Mapping of nidogen binding sites for collagen type IV, heparan sulfate proteoglycan, and zinc. *J.*  
872 *Biol. Chem.* *268*, 10881–10887.
- 873 Schmitt, E.A., and Dowling, J.E. (1994). Early eye morphogenesis in the zebrafish, *Brachydanio*  
874 *rerio*. *J. Comp. Neurol.* *344*, 532–542.
- 875 Schook, P. (1980). Morphogenetic movements during the early development of the chick eye. A  
876 light microscopic and spatial reconstructive study. *Acta Morphol. Neerl. Scand.* *18*, 1–30.
- 877 Sedykh, I., Yoon, B., Roberson, L., Moskvina, O., Dewey, C.N., and Grinblat, Y. (2017).

878 Zebrafish *zic2* controls formation of periocular neural crest and choroid fissure morphogenesis.  
879 *Dev. Biol.* *429*, 92–104.

880 Senior, R.M., Griffin, G.L., Mudd, M.S., Moxley, M.A., Longmore, W.J., and Pierce, R.A.  
881 (1996). Entactin expression by rat lung and rat alveolar epithelial cells. *Am. J. Respir. Cell Mol.*  
882 *Biol.* *14*, 239–247.

883 Sidhaye, J., and Norden, C. (2017). Concerted action of neuroepithelial basal shrinkage and  
884 active epithelial migration ensures efficient optic cup morphogenesis. *Elife* *6*, 1–29.

885 Soules, K.A., and Link, B.A. (2005). Morphogenesis of the anterior segment in the zebrafish eye.  
886 *BMC Dev. Biol.* *5*, 12.

887 Sowden, J.C. (2007). Molecular and developmental mechanisms of anterior segment dysgenesis.  
888 *Eye (Lond)*. *21*, 1310–1318.

889 Svoboda, K.K., and O’Shea, K.S. (1987). An analysis of cell shape and the neuroepithelial basal  
890 lamina during optic vesicle formation in the mouse embryo. *Development* *100*, 185–200.

891 Thesleff, I. (2003). Epithelial-mesenchymal signalling regulating tooth morphogenesis. *J. Cell*  
892 *Sci.* *116*, 1647–1648.

893 Thisse, B., and Thisse, C. (2004). Fast Release Clones: A High Throughput Expression Analysis.  
894 ZFIN Direct Data Submiss.

895 Thisse, C., and Thisse, B. (2008). High-resolution in situ hybridization to whole-mount zebrafish  
896 embryos. *Nat. Protoc.* *3*, 59–69.

897 Tuckett, F., and Morriss-Kay, G.M. (1986). The distribution of fibronectin, laminin and entactin  
898 in the neurulating rat embryo studied by indirect immunofluorescence. *J. Embryol. Exp.*  
899 *Morphol.* *94*, 95–112.

900 Walls, G.L. (1942). The vertebrate eye and its adaptive radiation (Hafner Publishing Company).

901 Wan, Y., Otsuna, H., Chien, C. Bin, and Hansen, C. (2009). An interactive visualization tool for  
902 multi-channel confocal microscopy data in neurobiology research. *IEEE Trans. Vis. Comput.*  
903 *Graph.* *15*, 1489–1496.

904 Wan, Y., Otsuna, H., Holman, H.A., Bagley, B., Ito, M., Lewis, A.K., Colasanto, M., Kardon,  
905 G., Ito, K., and Hansen, C. (2017). FluoRender: Joint freehand segmentation and visualization  
906 for many-channel fluorescence data analysis. *BMC Bioinformatics* *18*, 1–15.

907 Wang, W.-D., Melville, D.B., Montero-Balaguer, M., Hatzopoulos, A.K., and Knapik, E.W.  
908 (2011). *Tfap2a* and *Foxd3* regulate early steps in the development of the neural crest progenitor  
909 population. *Dev. Biol.* *360*, 173–185.

910 Weiss, O., Kaufman, R., Michaeli, N., and Inbal, A. (2012). Abnormal vasculature interferes  
911 with optic fissure closure in *lmo2* mutant zebrafish embryos. *Dev. Biol.* *369*, 191–198.

912 Wells, K.L., Gaete, M., Matalova, E., Deutsch, D., Rice, D., and Tucker, A.S. (2013). Dynamic  
913 relationship of the epithelium and mesenchyme during salivary gland initiation: the role of  
914 *Fgf10*. *Biol. Open* *2*, 981–989.

915 Willem, M., Miosge, N., Halfter, W., Smyth, N., Jannetti, I., Burghart, E., Timpl, R., and Mayer,  
916 U. (2002). Specific ablation of the nidogen-binding site in the laminin  $\gamma 1$  chain interferes with  
917 kidney and lung development. *Development* *129*, 2711–2722.

918 Williams, A.L., and Bohnsack, B.L. (2015). Neural crest derivatives in ocular development:  
919 Discerning the eye of the storm. *Birth Defects Res. Part C - Embryo Today Rev.* *105*, 87–95.

920 Zhu, P., Ma, Z., Guo, L., Zhang, W., Zhang, Q., Zhao, T., Jiang, K., Peng, J., and Chen, J.  
921 (2017). Short body length phenotype is compensated by the upregulation of nidogen family  
922 members in a deleterious *nid1a* mutation of zebrafish. *J. Genet. Genomics* *44*, 553–556.

923

## Figures

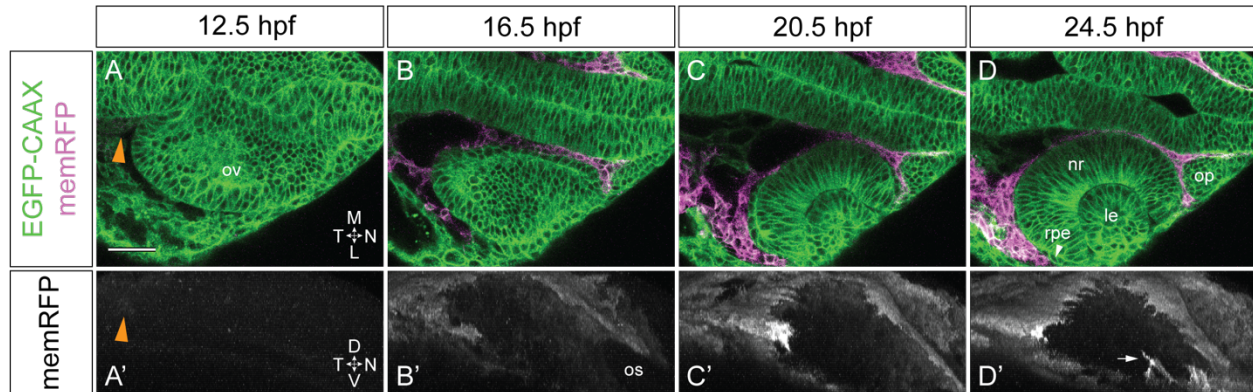

**Figure 1.** Neural crest is in contact with the optic vesicle throughout optic cup morphogenesis. Live imaging time series from 12.5-24.5 hpf of a *Tg(bactin2:EGFP-CAAX);Tg(sox10:memRFP)* double transgenic embryo. (A-D) Dorsal view, single confocal sections from a 4D dataset. (A'-D') Lateral view, 3D rendering of the RFP channel from the same dataset as shown in (A-D). Orange arrowheads in A, A' indicate neural crest cells beginning to express memRFP. White arrowhead in D indicates retinal pigment epithelium between neural crest and neural retina. White arrow in D' indicates neural crest-derived cells entering the optic fissure. Scale bar, 50  $\mu$ m.  $\Delta T$  between z-stacks, 3.5 minutes. ov, optic vesicle; os, optic stalk; nr, neural retina; rpe, retinal pigment epithelium; le, lens; op, olfactory placode. M, medial; L, lateral; D, dorsal; V, ventral; N, nasal; T, temporal.



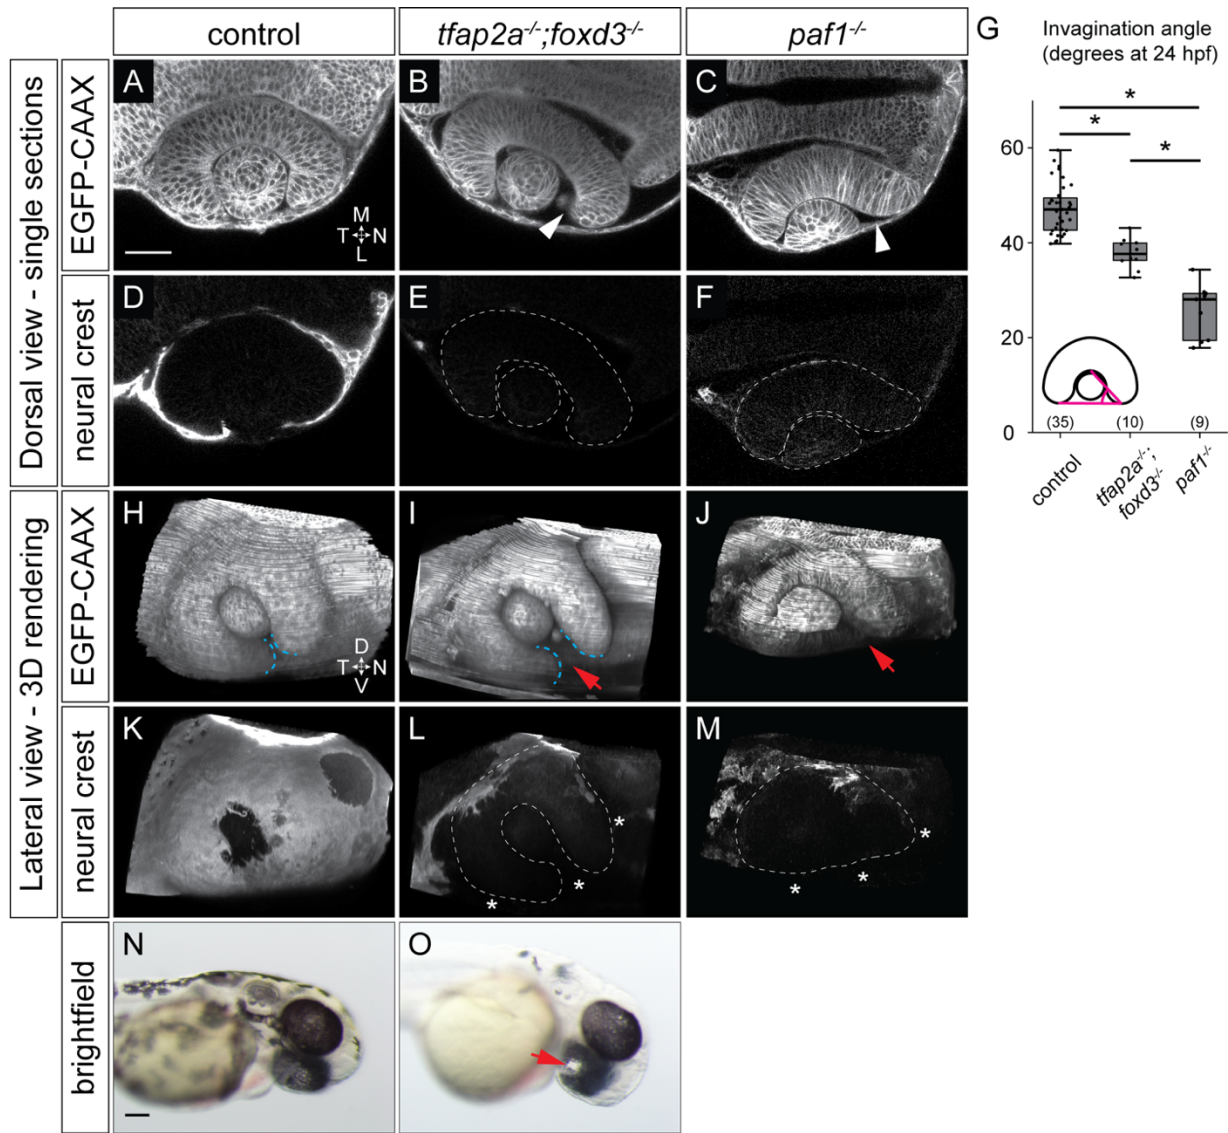

**Figure 2.** Optic cup morphogenesis is disrupted in neural crest mutants. (A-F) Dorsal view, single confocal sections of 24 hpf *Tg(sox10:memRFP)*-positive control (A, D), *tfap2a;foxd3* double mutant (B, E), and *paf1* mutant (C, F) embryos. Sections shown are at the dorsal/ventral midpoint of the lens. EGFP-CAAX was used to visualize optic cup morphology: (A, B) *Tg(bactin2:EGFP-CAAX)*; (C) injected with EGFP-CAAX mRNA. White dashed lines (E, F, L, M) show optic cup boundaries. White arrowheads (B, C) mark the nasal retina failing to fully enwrap the lens. (G) Quantification of invagination angles, measured as shown in inset diagram. \* $P < 0.001$  using Welch's t-test. (Control vs. *paf1* mutant,  $P = 6.59 \times 10^{-7}$ ; control vs. *tfap2a;foxd3* double mutant,  $P = 2.52 \times 10^{-7}$ ; *tfap2a;foxd3* double mutant vs. *paf1* mutant,  $P = 0.0001$ .) Results are from 2-3 experiments; n (embryos) shown at base of the graph. (H-M) Lateral view, 3D renderings of the embryos in (A-F). Blue dashed lines mark optic fissure margins. Note widened optic fissure margins in the *tfap2a;foxd3* mutant in (I); no discernable margins are visible in the *paf1* mutant at 24 hpf. White asterisks (L, M) indicate regions missing neural crest. (N, O) Brightfield images of 52 hpf control and *tfap2a;foxd3* double mutant embryos. Red arrows (I, J, O) indicate coloboma. Scale bars: 50  $\mu\text{m}$  in (A), 100  $\mu\text{m}$  in (N). M, medial; L, lateral; D, dorsal; V, ventral; N, nasal; T, temporal.

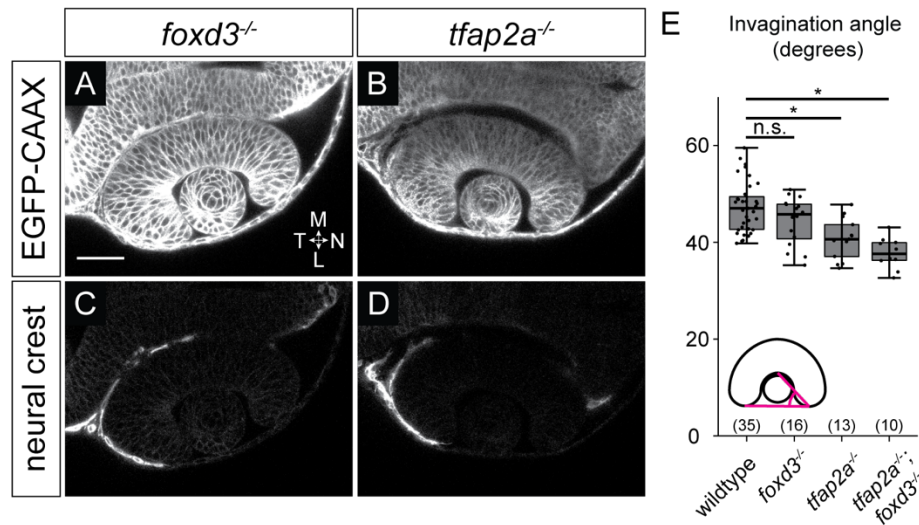

**Figure S1.** Invagination is disrupted in *tfap2a* but not *foxd3* single mutants. (A-D) Dorsal view, single confocal sections of 24 hpf *Tg(bactin2:EGFP-CAAX);Tg(sox10:memRFP)* double transgenic *foxd3* (A, C) and *tfap2a* (B, D) mutant embryos. Sections shown are at the dorsal/ventral midpoint of the lens. (E) Quantification of invagination angles, measured as shown in the inset diagram. \* $P < 0.001$  using Welch's t-test. (Wildtype vs. *tfap2a*;*foxd3* double mutant,  $P = 2.52 \times 10^{-7}$ ; wildtype vs. *tfap2a* single mutant,  $P = 0.0001$ ; wildtype vs. *foxd3* single mutant,  $P = 0.07$ .) Results are from 3 experiments; n (embryos) shown in the base of the graph. Scale bar, 50  $\mu$ m. M, medial; L, lateral; N, nasal; T, temporal.

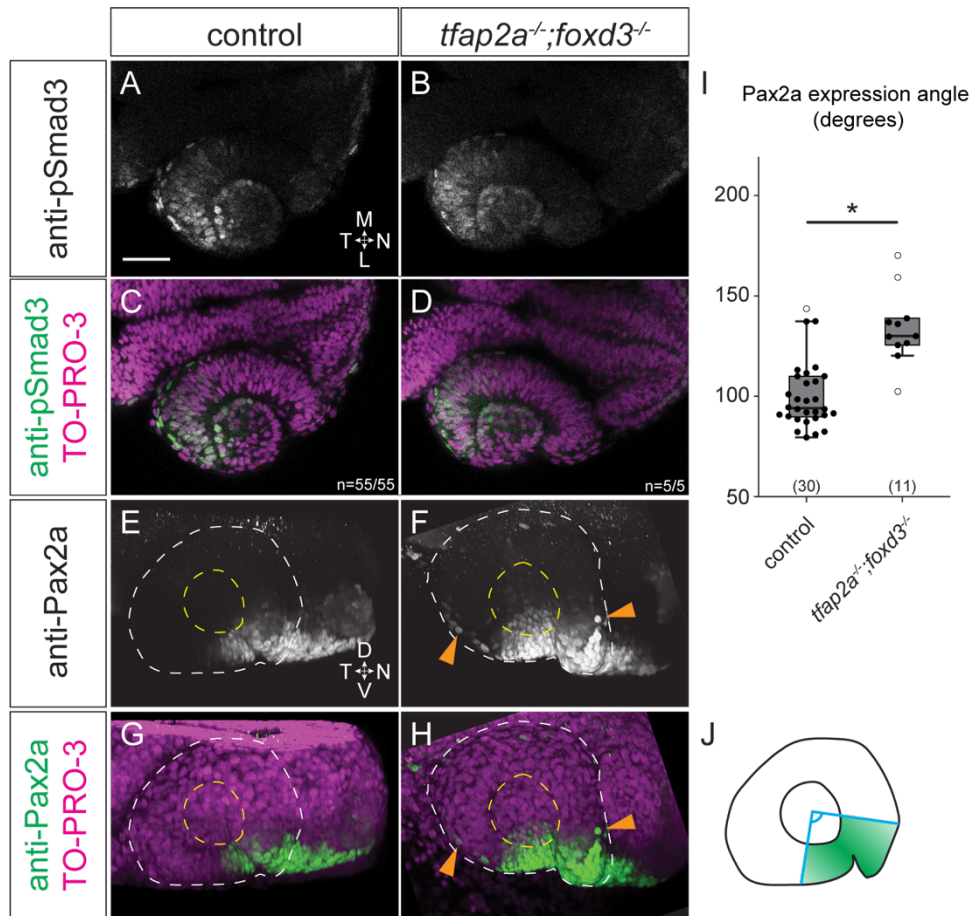

**Figure 3.** At 24 hpf, *tfap2a;foxd3* double mutants display normal TGF-beta signaling, while Pax2a expression expands into the RPE. (A-D) Dorsal view, single confocal sections of 24 hpf control (A, C) and *tfap2a;foxd3* double mutant (B,D) optic cups stained with anti-phospho-Smad3. Sections shown are at the dorsal/ventral lens midpoint. (E-H) Lateral view, 3D renderings of 24 hpf control (E, G) and *tfap2a;foxd3* double mutant (F,H) optic cups stained with anti-Pax2a. White dashed circles denote the boundary of the optic cup, yellow dashed circles display the boundary of the lens. Orange arrowheads in (F, H) indicate RPE cells which ectopically express Pax2a. (I) Angle measurements of the Pax2a expressing portion of control and *tfap2a;foxd3* double mutant optic cups. \* $P=5.39 \times 10^{-5}$  using Welch's t-test, white circles are outliers. Results are from 3 experiments; n (embryos) shown in the base of the graph. Angles were measured from the lateral surface as diagrammed in (J), with the vertex of the angle set at the center of the lens. Nuclei were counterstained with TO-PRO-3 (magenta); merges shown in (C, D, G, H). M, medial; L, lateral; D, dorsal; V, ventral; N, nasal; T, temporal.



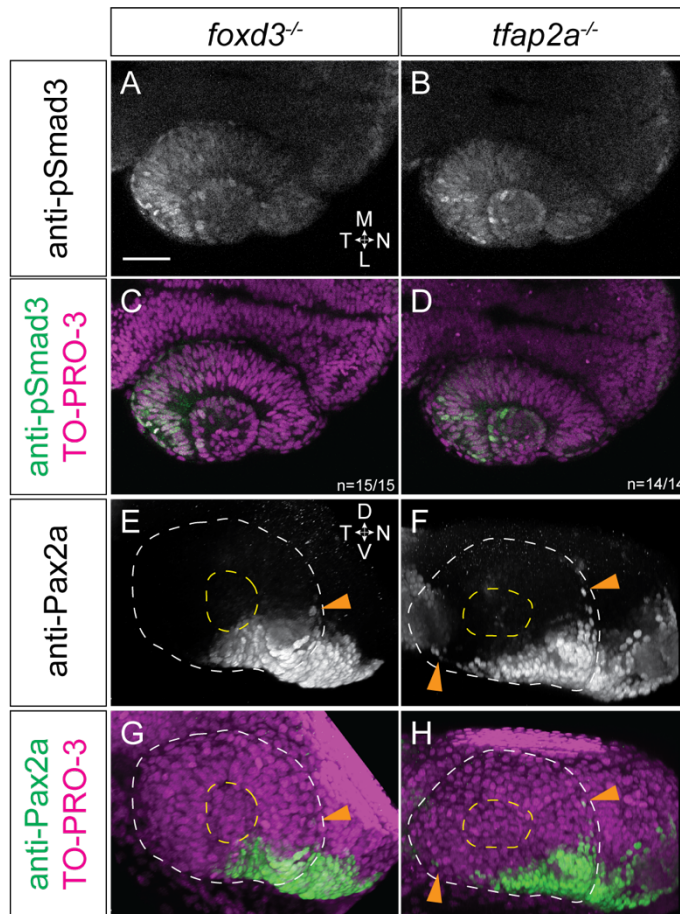

**Figure S2.** At 24 hpf, *tfap2a* and *foxd3* single mutants display normal TGF-beta signaling, while Pax2a expression expands into the RPE. (A-D) Dorsal view, single confocal sections of 24 hpf *foxd3* mutant (A, C) and *tfap2a* mutant (B,D) optic cups stained with anti-phospho-Smad3. Sections shown are at the dorsal/ventral lens midpoint. (E-H) Lateral view, 3D renderings of 24 hpf *foxd3* mutant (E, G) and *tfap2a* mutant (F,H) optic cups stained with anti-Pax2a. White dashed circles denote the boundary of the optic cup, yellow dashed circles display the boundary of the lens. Orange arrowheads in (E-H) indicate RPE cells which ectopically express Pax2a. Nuclei were counterstained with TO-PRO-3 (magenta); merges shown in (C, D, G, H). M, medial; L, lateral; D, dorsal; V, ventral; N, nasal; T, temporal.

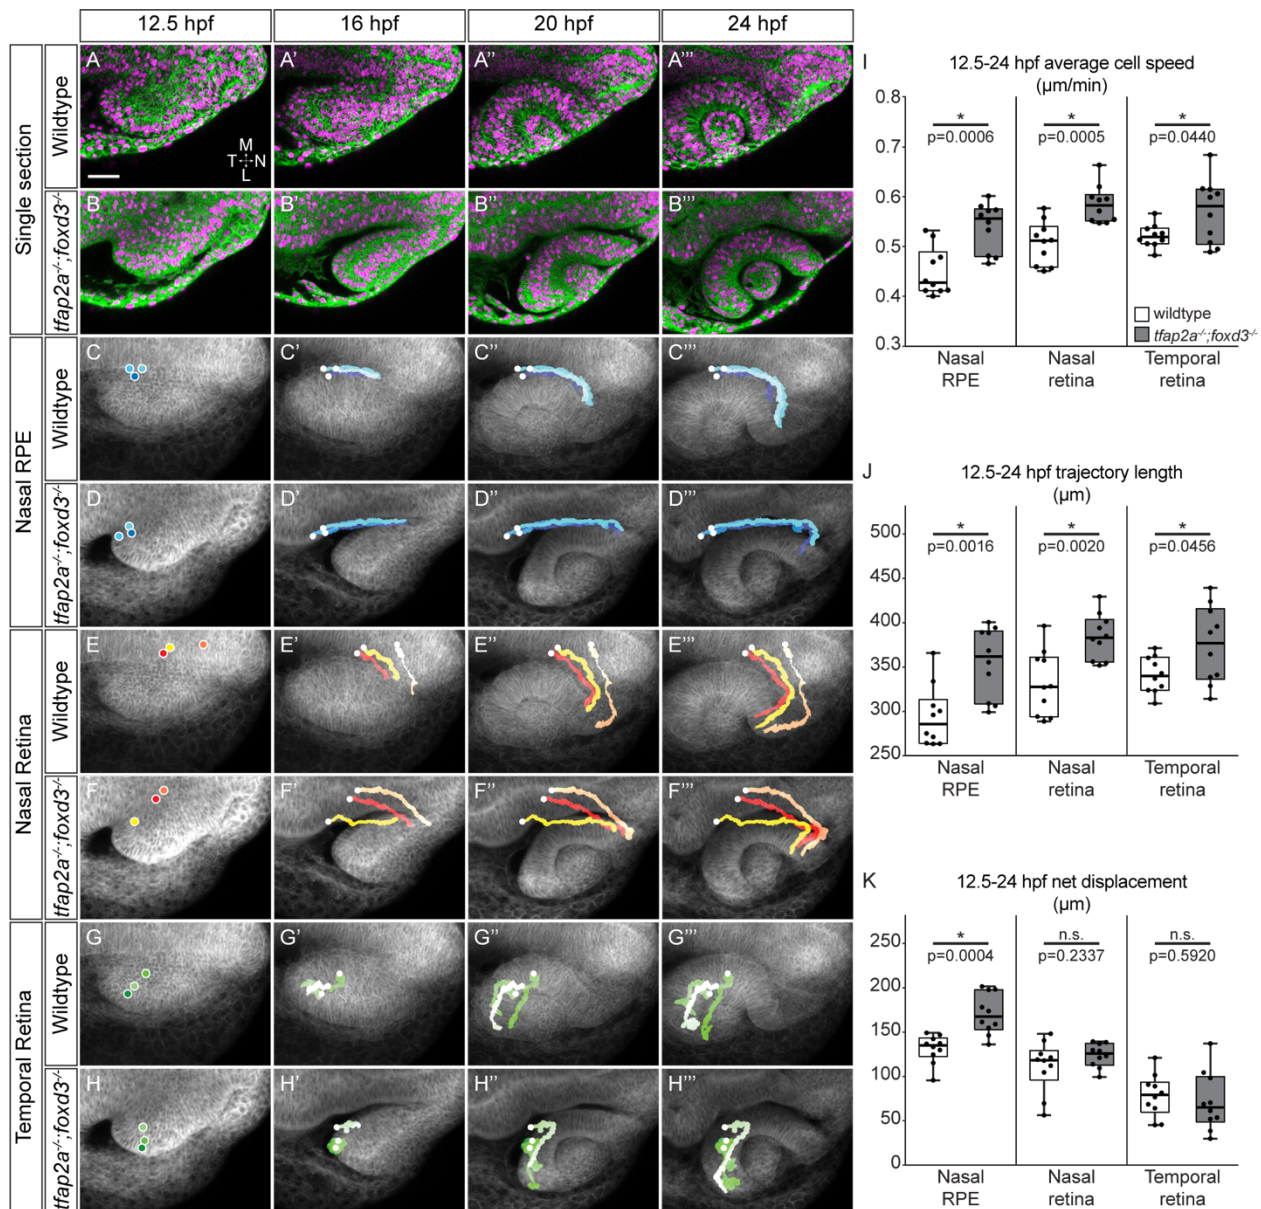

**Figure 4.** Cell movements throughout the optic cup are disrupted in *tfap2a;foxd3* double mutants. Live imaging time series of optic cup morphogenesis from 12.5-24 hpf of *Tg(bactin2:EGFP-CAAX)* wildtype and *tfap2a;foxd3* double mutant embryos. (A-B''') Dorsal view, single confocal sections from wildtype (A-A''') and *tfap2a;foxd3* double mutant (B-B''') 4D datasets. EGFP-CAAX (green) labels cell membranes, while H2A.F/Z-mCherry (magenta) labels nuclei. (C-H''') Average projections of membrane (EGFP-CAAX) channel through  $\sim 60$   $\mu\text{m}$  centered at the dorsal/ventral midpoint of the optic vesicle with indicated nuclear trajectories (nasal RPE, nasal retina, or temporal retina) overlaid. Trajectories were measured in 3D and generated by adding nuclear signal selections over time. (I-K) Average cell speed (I), total trajectory length (J), and overall net displacement (K) from cells which contribute to indicated region at 24 hpf.  $n=10$  cells from each region (5 cells each from 2 embryos per genotype), backtracked from 24 to 12.5 hpf. P-values calculated using Welch's t-test. Scale bar, 50  $\mu\text{m}$ .  $\Delta T$  between z-stacks, 2.75 minutes (wildtype) or 2.5 minutes (*tfap2a;foxd3*). M, medial; L, lateral; N, nasal; T, temporal.



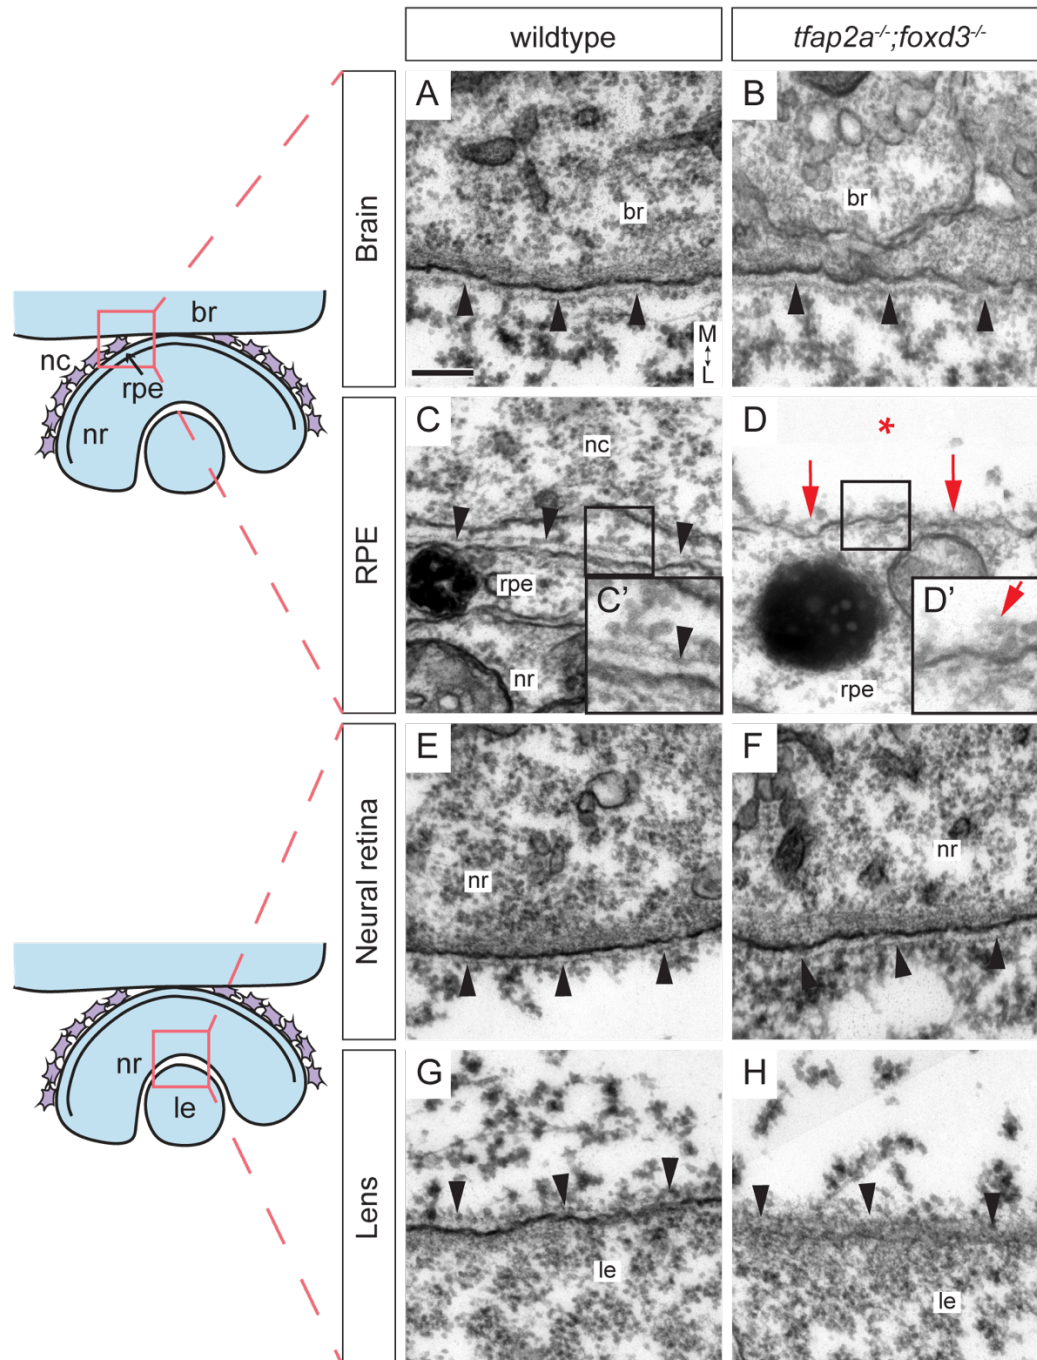

**Figure 5.** The basement membrane around the RPE is disrupted in *tfap2a;foxd3* double mutants. Transmission electron microscopy was used to visualize the basement membranes around the brain, RPE, neural retina, and lens in 24 hpf control (A, C, E, G) and *tfap2a;foxd3* double mutant (B, D, F, H) embryos, as diagrammed. The basement membrane around the RPE of *tfap2a;foxd3* mutant embryos appears disorganized (D, D' red arrows) compared to wildtype (C, C'), while all other basement membranes appear normal (black arrowheads). Scale bar, 200 nm. Magnification in (A-H)=10,000x, (C', D')=20,000x. br, brain; nc, neural crest cell; nr, neural retina; rpe, retinal pigment epithelium; le, lens. All images are transverse sections, anterior views. M, medial; L, lateral.

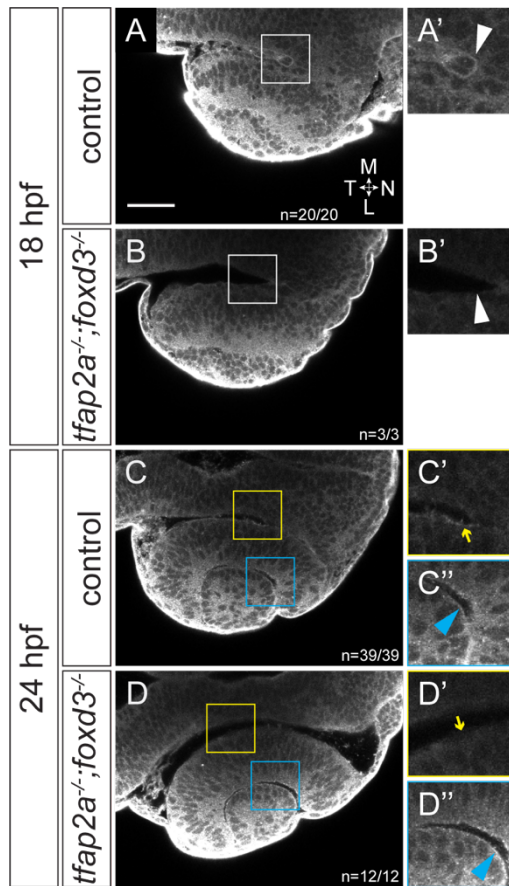

**Figure 6.** Nidogen protein is absent from the RPE side of the optic cup in *tfap2a;foxd3* double mutants. At 18 hpf, nidogen protein is detected by immunofluorescence in neural crest cells between the brain and developing RPE in the optic stalk furrow (A, magnified in A'). This expression is missing in *tfap2a;foxd3* double mutant embryos at 18 hpf and there are no cells visible in the same space (B, magnified in B'). At 24 hpf in control embryos, a nidogen ECM surface is detectable on along both the RPE (yellow box in C, yellow arrow in C') and at the lens-retina interface (C, C'', blue arrowhead). In 24 hpf *tfap2a;foxd3* double mutants, nidogen is not detectable along the RPE (D', yellow arrow), but is still present in the ECMs at the lens-retina interface (D'', blue arrowhead). Dorsal view, single confocal sections. Scale bar, 50  $\mu$ m.

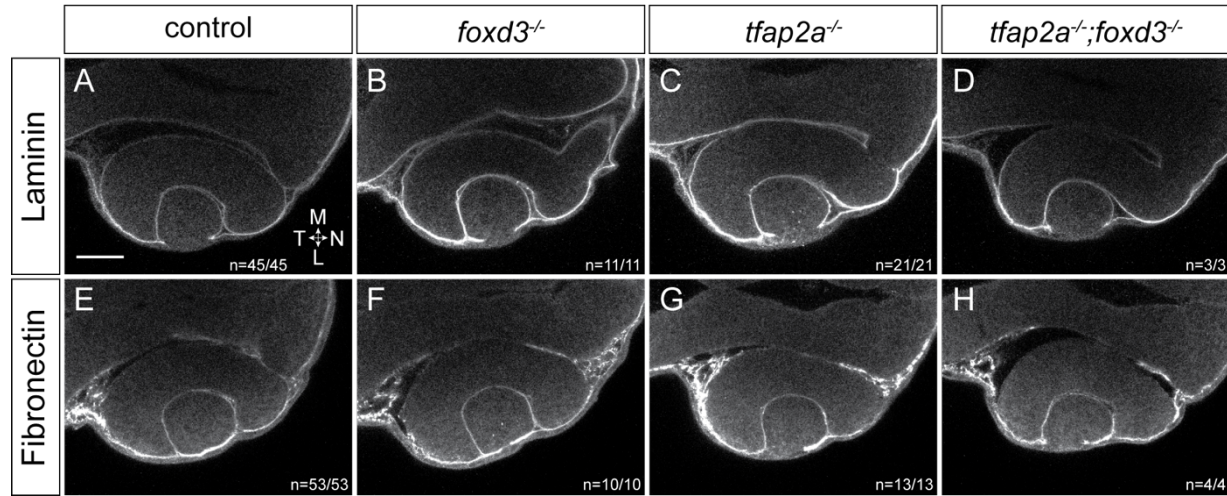

**Figure S3.** Laminin and fibronectin localization are unaffected in *tfap2a;foxd3* double mutants. At 24 hpf, both laminin (A-D) and fibronectin (E-H) are found around the developing optic cup in all genotypes shown. Dorsal view, single confocal sections. Scale bar, 50  $\mu$ m. M, medial; L, lateral; N, nasal; T, temporal.



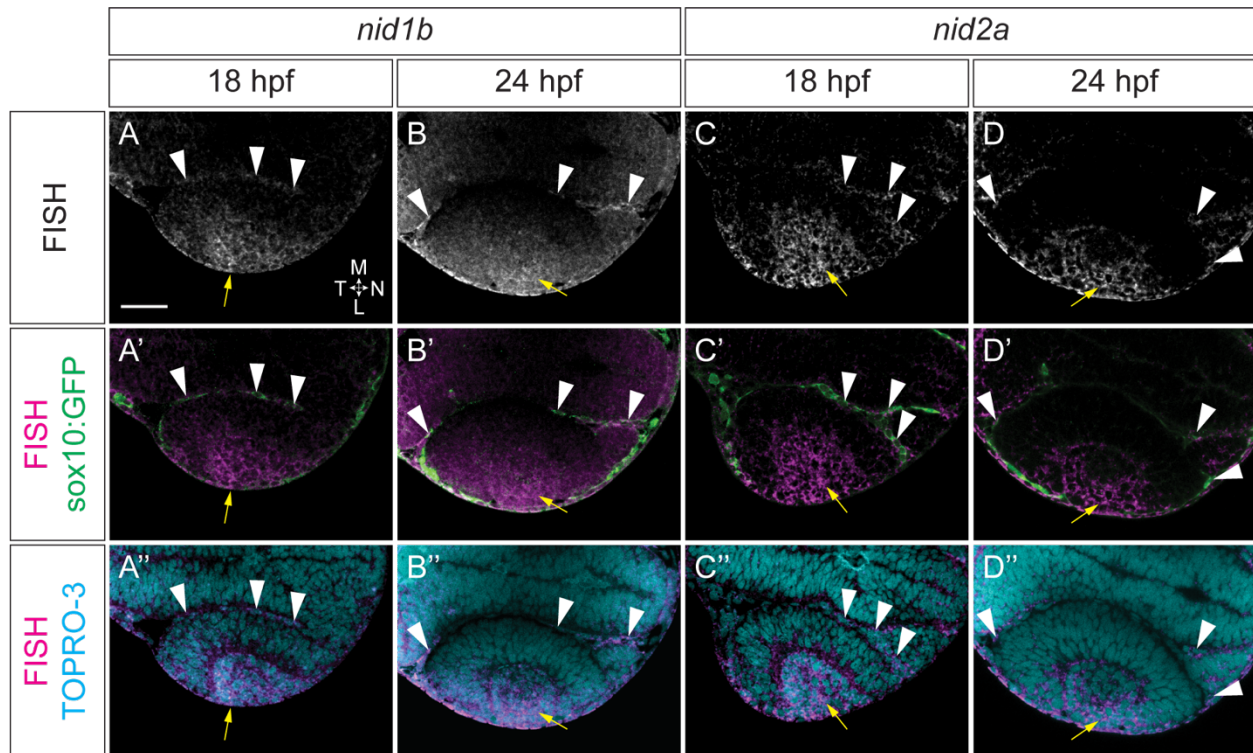

**Figure 7.** Nidogen 1b and 2a are expressed in the neural crest and developing lens. *In situ* were performed in *Tg(sox10:GFP)* embryos at 18 (A-A'', C-C'') and 24 hpf (B-B'', D-D''). (A-D) Fluorescence *in situ* hybridization with probes against *nid1b* (A,B) and *nid2a* (C,D). (A'-D') FISH merged with *sox10:GFP* expression (green) to visualize colocalization between FISH and GFP<sup>+</sup> neural crest cells (white arrowheads). GFP signal was amplified after hybridization using an anti-GFP antibody. (A''-D'') FISH merged with nuclei counterstained with TO-PRO-3. Yellow arrows denote lens expression in each case. Dorsal view, single confocal sections. Scale bar, 50  $\mu$ m.

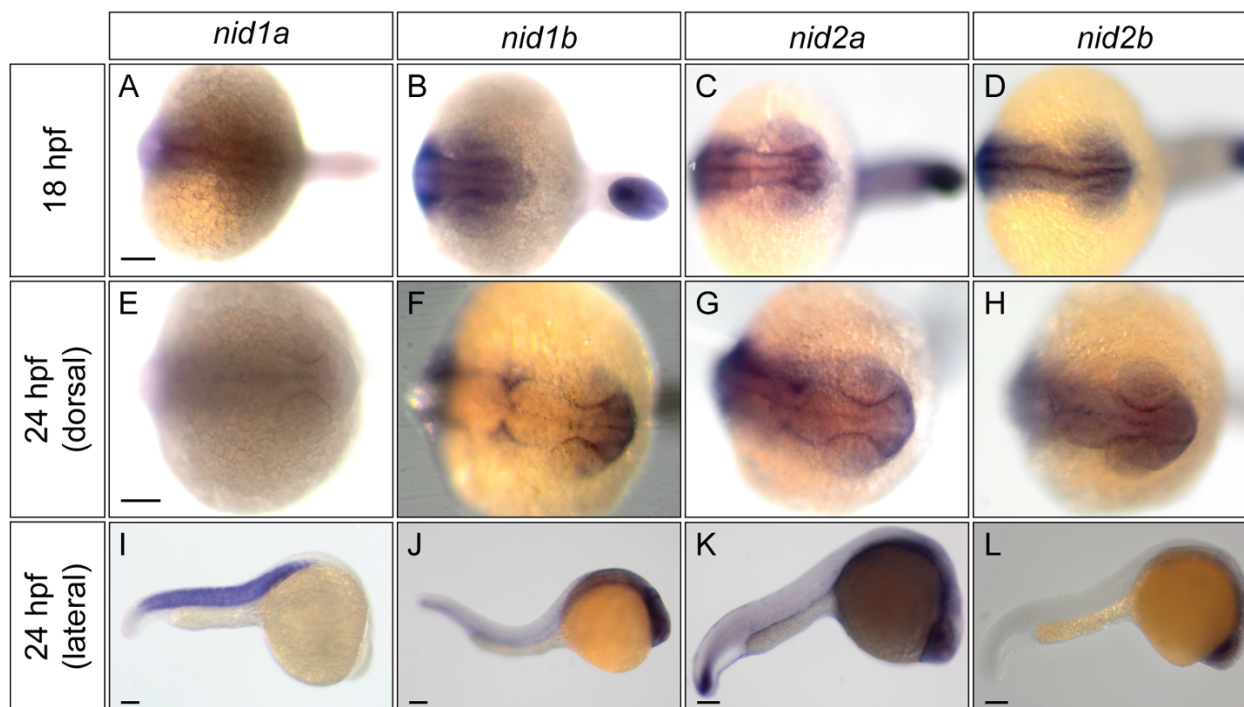

**Figure S4.** Zebrafish nidogen mRNA expression patterns at 18 and 24 hpf. Scale bars, 100  $\mu$ m.

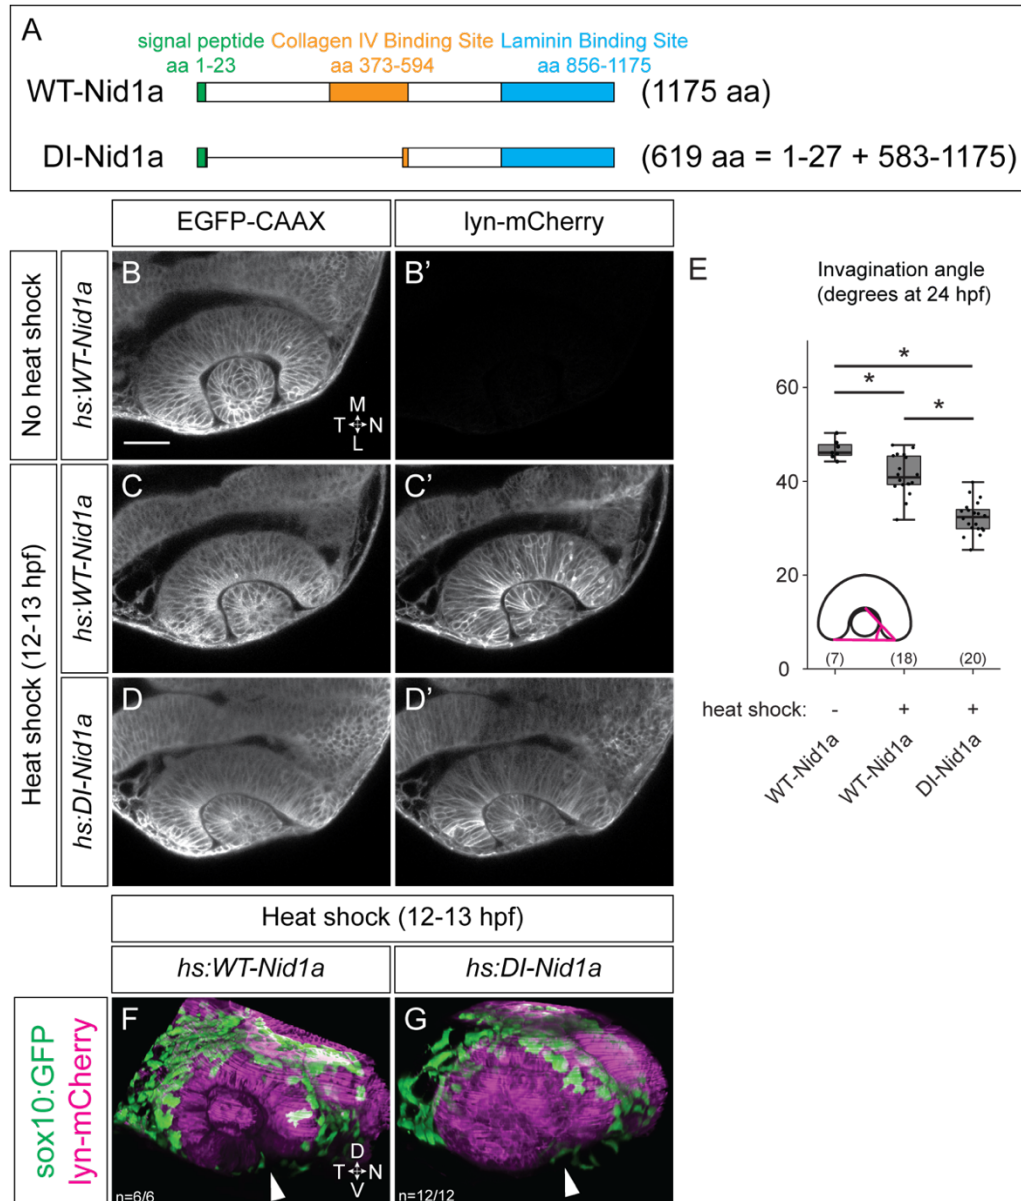

**Figure 8.** Dominant-interfering nidogen disrupts optic cup morphogenesis. (A) Schematics of full length (WT) and dominant-interfering (DI) Nidogen 1a. (B-D') Dorsal view, single confocal sections. *Tg(bactin2:EGFP-CAAX)* females were crossed to either *hs:WT-Nid1a* (B-C') or *hs:DI-Nid1a* (D, D') transgenic males. Control embryos (B, B') were not heat shocked, show no lyn-mCherry expression; experimental embryos were heat shocked 12-13 hpf (C-D'). (E) Quantification of invagination angles, measured as shown in inset diagram. \* $P < 0.005$  using Welch's t-test. (*WT-Nid1a* no heat shock vs. heat shock,  $P = 0.001$ ; *WT-Nid1a* heat shock vs. *DI-Nid1a* heat shock,  $P = 4.34 \times 10^{-10}$ ; *WT-Nid1a* no heat shock vs. *DI-Nid1a* heat shock,  $P = 7.76 \times 10^{-11}$ ; *DI-Nid1a* no heat shock vs. heat shock (not shown),  $P = 6.46 \times 10^{-14}$ .) Results are from 3 experiments; n (embryos) shown in base of graph. (F, G) Lateral view, 3D renderings at 24 hpf. *sox10:GFP* transgenic females were crossed to either *hs:WT-Nid1a* (F) or *hs:DI-Nid1a* (G) transgenic males, embryos heat shocked 12-13 hpf. GFP-positive neural crest cells migrate around the optic cup and into the optic fissure (white arrowheads) in both conditions. Scale bar, 50  $\mu\text{m}$ . M, medial; L, lateral; N, nasal; T, temporal.

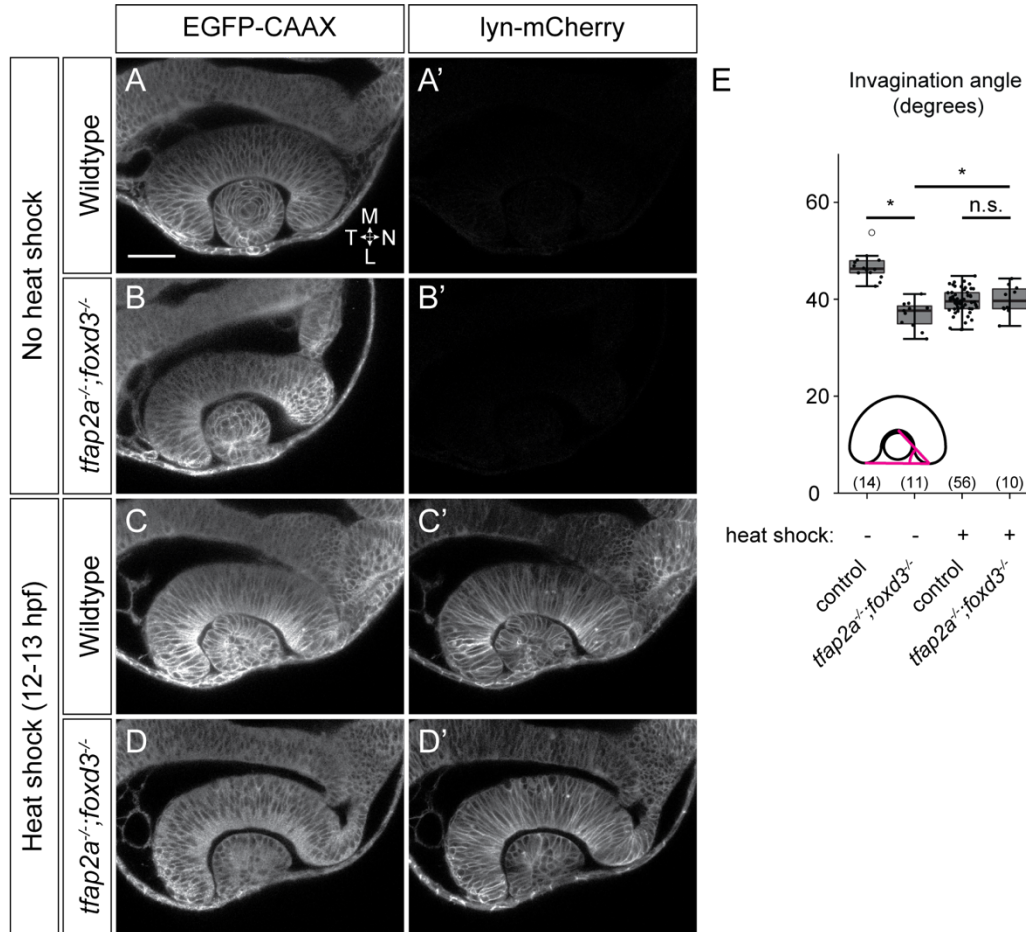

**Figure 9.** Overexpression of *Nid1a* partially rescues optic cup morphogenesis in *tfap2a;foxd3* double mutants. Dorsal view, single confocal sections from 24 hpf *Tg(hs:WT-Nid1a)*-positive embryos. (A-B') EGFP-CAAX and lyn-mCherry channels from wildtype (A, A') and *tfap2a;foxd3* double mutant (B, B') embryos which were not subjected to a heat shock. (C-D') EGFP-CAAX and lyn-mCherry channels from wildtype (C, C') and *tfap2a;foxd3* double mutant (D, D') embryos which were heat shocked from 12-13 hpf. (E) Quantification of invagination angles, measured as shown in the inset diagram. \* $P < 0.05$  using Welch's t-test; n.s., not significant. (Wildtype (no heat shock) vs. *tfap2a;foxd3* double mutant (no heat shock),  $P = 1.42 \times 10^{-8}$ ; *tfap2a;foxd3* double mutant no heat shock vs. heat shock,  $P = 0.03$ ; wildtype (heat shock) vs. *tfap2a;foxd3* (heat shock),  $P = 0.76$ .) Results are from 3 experiments; n (embryos) shown in the base of the graph. Scale bar, 50  $\mu\text{m}$ . M, medial; L, lateral; N, nasal; T, temporal.



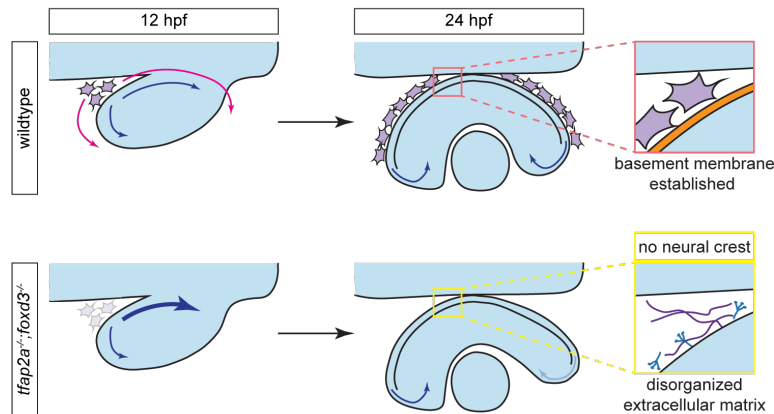

**Figure 10.** Model of neural crest function during optic cup morphogenesis. Optic cup morphogenesis in a wildtype embryo (top row) and a *tfap2a*;*foxd3* double mutant (bottom row). In wildtype embryos, neural crest cells (purple) begin to migrate around the optic vesicle (magenta arrows) starting around 12 hpf and enwrap the retinal pigment epithelium by 24 hpf. During this process neural crest cells express and deposit nidogen, which establishes the basement membrane (orange) around the RPE and restricts cell movements within the prospective eye (blue arrows), in turn enabling proper rim movement and optic cup morphogenesis. In *tfap2a*;*foxd3* double mutants which lack most neural crest cells, the ECM surrounding the RPE is disorganized and does not form a coherent basement membrane. Cell movements within the optic vesicle are unrestricted (heavy blue arrow), leading to the abnormal position of the anterior RPE and disrupted rim movement of cells which would normally migrate into the neural retina.



**Supplemental Movie 1.** Neural crest migration during optic cup morphogenesis. 12.5-24.5 hpf timelapse of a *Tg( $\beta$ -actin2:EGFP-CAAX);Tg(sox10:memRFP)* double transgenic embryo. EGFP-CAAX labels all cell membranes (green), while membrane-bound RFP (magenta) labels only the neural crest. Dorsal view, single confocal section through the dorsal/ventral midpoint of the optic cup. Nasal (anterior) is to the right, temporal (posterior) to the left.  $\Delta T$  between z-stacks, 3 minutes 30 seconds.

**Supplemental Movie 2.** Neural crest migration during optic cup morphogenesis. 12.5-24.5 hpf timelapse of a *Tg( $\beta$ -actin2:EGFP-CAAX);Tg(sox10:memRFP)* double transgenic embryo. Lateral view, 3D rendering of the same timelapse dataset shown in Supplemental Movie 1. Only the RFP channel is shown (grayscale) to enable visualization of neural crest cell migration. Nasal (anterior) is to the right, temporal (posterior) to the left, dorsal to the top, ventral to the bottom.  $\Delta T$  between z-stacks, 3 minutes 30 seconds

**Supplemental Movie 3.** Nuclear trajectories visualized in in three dimensions. 3D rendered rotation of 24 hpf timepoints showing representative trajectories of nuclei from cells in the nasal retina (orange), nasal RPE (blue) and temporal retina (green). Membrane channel is displayed in grayscale.

**Supplemental Movie 4.** Wildtype nasal RPE nuclear trajectories from 12.5-24 hpf. Representative trajectories over membrane channel average (grayscale).  $\Delta T$  between z-stacks, 2 minutes 45 seconds.

**Supplemental Movie 5.** *tfap2a;foxd3* double mutant nasal RPE nuclear trajectories from 12.5-24 hpf. Representative trajectories over membrane channel average (grayscale).  $\Delta T$  between z-stacks, 2 minutes 30 seconds.

**Supplemental Movie 6.** Wildtype nasal retina nuclear trajectories from 12.5-24 hpf. Representative trajectories over membrane channel average (grayscale).  $\Delta T$  between z-stacks, 2 minutes 45 seconds.

**Supplemental Movie 7.** *tfap2a;foxd3* double mutant nasal retina nuclear trajectories from 12.5-24 hpf. Representative trajectories over membrane channel average (grayscale).  $\Delta T$  between z-stacks, 2 minutes 30 seconds.

**Supplemental Movie 8.** Wildtype temporal retina nuclear trajectories from 12.5-24 hpf. Representative trajectories over membrane channel average (grayscale).  $\Delta T$  between z-stacks, 2 minutes 45 seconds.

**Supplemental Movie 9.** *tfap2a;foxd3* double mutant temporal retina nuclear trajectories from 12.5-24 hpf. Representative trajectories over membrane channel average (grayscale).  $\Delta T$  between z-stacks, 2 minutes 30 seconds.
